# Supplementary material for: Facultative methanotrophs are abundant at terrestrial natural gas seeps
Source: Microbiome. 2018 Jun 28;6:118. doi: 10.1186/s40168-018-0500-x (PMC6022506; doi:10.1186/s40168-018-0500-x)
Supplement: Supplementary file 2 — Table S2. Bacterial abundance assessed by 16S rRNA. (XLSX 147 kb) [file 40168_2018_500_MOESM2_ESM.xlsx]

## Sheet: Table S2
Table S2. Abundance (%) of bacterial and archaeal genera in environmental samples based on 16S rRNA amplicons (green colour: with abundance greater than 1% in any sample)
Genera	Lakenheath Fen Nature Reserve soil	Lakenheath Fen Nature Reserve sediments	Moor House Nature Reserve 1	Moor House Nature Reserve 2	Movile Cave microbial mat	Andreiasu Everlasting Fire 1	Andreiasu Everlasting Fire 2	Ellicott Creek 1	Ellicott Creek 2	Pipe Creek main seep	Pipe Creek minor seep	Eternal Flames Falls 1	Eternal Flames Falls 2	Eighteen Mile Creek	Gasport 1	Total	Average
Total reads	27623	23721	60390	28160	36886	56234	53001	57255	39377	40445	33556	37976	34874	66530	21645	617673	41178.2
Paralemanea	0.0760236	0.0843135	0.0447094	0.0674716	0.0352437	0.0764662	0.0735835	0.0698629	0.11174	0.0568674	0.154965	43.1773	0.0774216	0.091688	0.12936
Malikia	0.0905043	0.0800978	0.0430535	0.0461648	0.140975	0.142263	0.0245278	21.8898	0.180308	0.0939548	0.116224	0.0447651	0.223662	0.091688	1.386
Barnesiella	0.0434421	0.0505881	0.0298063	0.0177557	0.0433769	0.0515702	0.158488	18.725	0.218402	0.0642848	0.0447014	0.0684643	5.88117	0.0390801	0.10164
Mycobacterium	0.307715	0.274019	0.112601	0.0923295	16.0657	17.292	0.0547159	0.0541437	0.220941	0.18791	1.04601	0.168527	0.0917589	0.055614	0.0739201
Acinetobacter	0.0253412	0.0379411	0.0248385	0.0390625	0.0379548	0.0551268	0.0716968	2.15003	1.71166	0.269502	0.253308	0.155361	17.0643	0.0871787	0.1155
Nitrosovibrio	1.04261	1.31529	15.4148	12.4467	0.929892	0.862468	1.86223	0.267226	0.787262	0.289282	0.733103	0.334422	0.166313	4.06583	0.33264
Thiobacillus	0.452521	0.585979	0.0563007	0.0461648	3.71686	3.8322	1.98864	4.49393	0.39871	0.269502	0.280129	0.10533	0.129036	15.2397	0.766921
Phaeodactylum	0.908663	0.168627	0.220235	0.0319602	0.352437	0.321869	0.0113205	0.0908218	0.378393	0.0346149	0.905948	0.497683	0.157711	1.18593	15.1906
Holophaga	1.55667	1.8296	5.42805	13.4304	0.048799	0.0782445	0.126413	0.0174657	0.119359	0.0717023	0.202646	0.0552981	0.103229	0.0571171	0.0646801
Flavobacterium	1.29602	1.36166	0.362643	0.362216	0.767229	0.807341	1.53205	1.42171	12.3143	0.328842	3.42115	2.60691	13.305	2.14039	3.76068
Rhodoferax	0.119466	0.181274	0.0331181	0.024858	0.132842	0.152932	0.0339616	0.338835	0.101582	0.192854	2.06818	1.17443	0.926191	12.3854	0.716101
Acidobacterium	4.09803	3.79411	11.848	8.55824	0.330749	0.380553	0.430181	0.0681163	0.810118	0.267029	1.15628	0.521382	0.111831	0.12175	0.577501
Sulfurovum	0.0362017	0.0548038	0.0198708	0.0568182	0.0650653	0.0657965	0.13962	10.5353	0.195546	0.0988997	0.062582	0.0263324	0.0458795	9.72794	1.46454
Prosthecobacter	0.365637	0.31196	0.442126	0.426136	0.0840427	0.10314	1.05281	0.0331849	0.490134	10.5229	1.02515	0.279124	0.0544818	0.0270555	0.2079
Macellibacteroides	0.021721	0.025294	0.00662361	0.00710227	0.0162663	0.0160046	0.00754703	0.036678	0.0507911	9.75399	0.0387412	0.0131662	0.66812	0.0270555	0.0231
Chryseobacterium	0.0398219	0.0210784	0.0115913	0.00710227	0.0135553	0.0231177	0.0188676	0.111781	0.0304746	0.0543949	0.0208607	0.0895302	9.51712	0.118743	0.00924001
Candidatus Koribacter	0.101365	0.113823	9.43203	3.49077	0.0162663	0.0355657	0.0150941	0.0192123	0.0152373	0.0296699	0.0178806	0.0131662	0.0229397	0.0105216	0.02772
Actinoallomurus	0.0398219	0.143333	9.24491	1.48438	0.0243995	0.0302308	0.0169808	0.00873286	0.022856	0.0420324	0.0566218	0.0710975	0.0258072	0.0195401	0.01848
Steroidobacter	0.575607	0.792547	6.71138	8.55469	0.0406658	0.0657965	0.0358484	0.0436643	1.56944	0.0494499	0.253308	0.121129	0.043012	0.0465955	0.24486
Lutibacter	0.021721	0.0632351	0.00827952	0.0177557	0.0704874	0.0497919	0.166035	0.389486	0.162531	0.0173075	0.0476815	0.0236992	0.0286747	8.20532	1.3167
Sulfurospirillum	0.0144807	0.012647	0.016559	0.0106534	0.273817	0.254295	0.530179	0.49952	0.0431724	8.15923	0.0178806	0.0236992	0.0258072	0.55614	0.2079
Sulfuricurvum	0.0543026	0.18549	0.034774	0.0177557	0.0460879	0.0462354	3.41314	4.3053	0.0507911	0.306589	0.0834426	0.0263324	0.0344096	7.57403	8.14507
Methylococcus	0.0543026	0.0421567	0.0182149	0.024858	8.12232	8.03606	0.224524	0.0331849	0.203164	0.0593398	0.0506616	0.0789973	0.0745541	0.0826695	0.2079
Verrucomicrobium	0.325815	0.392058	0.471932	0.401278	5.8613	5.23705	0.501877	0.0436643	0.62473	1.4291	0.661581	0.400253	0.0831565	0.0345709	0.2079
Luteolibacter	0.144807	0.109608	0.00331181	0.00710227	0.214173	0.17605	0.0962246	0.118767	2.59796	0.0519224	0.685421	0.147462	0.229397	0.0285585	5.42389
Bacteroides	0.21721	0.320391	0.0794834	0.0568182	5.23505	4.61998	0.624517	1.15798	0.368235	4.70516	1.31124	0.279124	1.19573	0.695927	1.5015
Bellilinea	0.611809	0.733527	0.0264945	0.0106534	5.11576	5.22638	1.02074	0.908218	0.193006	1.0879	0.184766	0.0342321	0.0344096	0.091688	0.0646801
Methylocella	0.514064	0.510097	0.627587	0.71733	1.88689	1.90276	0.426407	0.365034	0.888844	5.11064	1.41852	0.508216	0.444457	0.344206	0.503581
Arcobacter	0.0325815	0.0632351	0.0149031	0.00355114	0.132842	0.172494	4.98859	0.153698	0.0914239	0.0370874	0.032781	0.0631978	2.42874	0.529085	0.16632
Aeromonas	0.021721	0.012647	0.0198708	0.0213068	0.0243995	0.024896	0.132073	0.221815	4.8988	1.6269	0.208607	0.086897	1.39359	0.0315647	0.23562
Pelotomaculum	0.865221	0.87686	0.0761716	0.351562	1.2498	1.05274	4.89425	1.1737	0.218402	0.182965	0.768864	0.0658311	0.0888914	0.315647	0.10626
Oligoflexus	0.0325815	0.0463724	0.00662361	0.0142045	0.00813317	0.0160046	0.0169808	0.00523972	0.0761866	0.0197799	0.0268208	4.84253	0.0172048	0.00901849	0.01386
Cloacibacterium	0.0181009	0.012647	0.00993542	0.00710227	0.00542211	0.0231177	0.0207543	0.777225	0.375854	0.704661	0.253308	0.0368654	4.71698	0.0135277	0.0231
Thiothrix	0.0181009	0.0505881	0.034774	0.0958807	0.048799	0.0586834	0.399992	0.808663	0.0406329	0.0222524	0.0834426	0.0210659	0.0229397	3.3173	4.16262
Exiguobacterium	0.021721	0.012647	0.00827952	0.0177557	0.0298216	0.0177828	0.0150941	0.268972	2.34147	4.00544	1.06091	0.102696	1.06383	0.0315647	0.0693001
Methylobacter	0.20273	0.0843135	0.016559	0.0106534	0.211462	0.257851	2.34147	0.108287	0.193006	0.0791198	0.837406	0.10533	0.0200723	0.0721479	3.91776
Cytophaga	2.88528	3.90371	0.086107	0.0568182	1.15762	1.18967	2.93579	1.71688	3.13889	0.595871	2.24103	1.72214	1.04662	1.39185	2.2638
Xanthobacter	0.0253412	0.012647	0.00662361	0.00710227	0.252128	0.312978	0.0113205	0.0174657	0.00761866	3.88923	0.0476815	0.0184327	0.00286747	0.018037	0.01386
Cyanobacterium	0.597328	0.105392	0.0612684	0.0142045	0.159952	0.188498	0.0283014	0.0943149	0.251416	0.0271974	2.66122	2.10396	0.183518	1.00256	3.76992
Treponema	0.101365	0.0379411	0.0016559	0.0213068	0.159952	0.10314	3.74144	0.165924	0.00253955	0.126097	0.00298009	0.00789973	0.00573493	0.229971	0.0693001
Gemmatimonas	1.7775	3.69715	0.0331181	0.102983	0.0243995	0.0266743	0.103772	0.0157192	0.446961	0.0222524	0.587078	0.160628	0.0286747	0.0841726	0.27258
Nitrospira	3.63827	2.9847	0.228515	0.241477	0.0650653	0.0622399	0.181129	0.0384246	0.378393	0.0296699	0.30993	0.205393	0.0258072	0.0781602	0.2079
Methylocystis	0.336676	0.269803	3.29194	3.57244	0.317194	0.337874	3.62446	0.0331849	0.203164	0.454939	0.479795	0.100063	0.0372771	0.0210431	0.1155
Rhodoplanes	2.43638	3.04372	3.5486	2.85866	0.0948869	0.11381	0.0811305	0.0314383	0.159992	0.0865373	0.241388	0.18696	0.0344096	0.0781602	0.0785401
Rhodoblastus	0.0181009	0.00843135	0.0397417	0.0284091	0.0162663	0.0302308	0.00566027	0	0.00253955	3.48622	0.196686	0.00789973	0.0172048	0.00601233	0
Candidatus Saccharimonas	0.278753	0.122255	0.0844511	0.205966	0.0515101	0.0586834	0.0245278	0.0209589	0.317444	0.0271974	3.26916	0.592479	0.0487469	0.0871787	0.33726
Clostridium	0.264273	0.290881	0.0910747	0.12429	0.664209	0.624178	0.720741	0.834862	0.439343	3.24144	0.31887	0.18696	0.19212	0.208928	0.40656
Candidatus Solibacter	0.333056	0.661861	3.21908	2.92259	0.0352437	0.0320091	0.520745	0.0192123	0.0711075	0.0370874	0.0685421	0.0289657	0.0143373	0.018037	0.0554401
Opitutus	0.756616	0.535391	0.814704	3.1179	0.0216884	0.024896	0.175468	0.0331849	1.1555	0.0395599	0.533437	0.379187	0.0888914	0.0135277	0.20328
Sphingobacterium	0.365637	0.168627	0.0712038	0.0710227	0.547633	0.483693	2.54335	3.07746	0.761866	0.116207	0.31589	0.0921635	0.45306	0.530588	0.40656
Methylobacillus	0.0108605	0.00421567	0.00331181	0.00710227	0.00271106	0.012448	2.94711	0.00523972	0.0126978	0.00988997	0.0119204	0.0289657	0.0143373	0.0285585	0.0508201
Arenimonas	0.0760236	0.0927448	0.00993542	0.00710227	0.0379548	0.0320091	0.369804	0.146712	0.751708	0.0370874	2.93241	1.26396	0.172048	0.00450924	0.3003
Insolitispirillum	0.00724034	0	0.00331181	0.0177557	0	0.00711313	0.00754703	0.0314383	0.0152373	2.90518	0.00298009	0.00526648	0.229397	0.0105216	0.00924001
Geothrix	0.170148	0.0969605	0.0198708	0.0319602	0.0189774	0.0284525	0.13962	0.0139726	0.00507911	1.04092	0.0745023	0.0421319	2.89614	0.0135277	0.1617
Fusibacter	0.0108605	0.0210784	0.00993542	0.0213068	0.105731	0.147598	0.298108	0.42791	2.87224	0.398071	0.0745023	0.0236992	0.596433	0.169848	1.2243
Phycisphaera	0.383738	0.299313	1.39758	2.85511	0.813317	0.746879	0.549046	0.00523972	0.152373	0.8629	0.151985	0.0368654	0.0286747	0.0210431	0.04158
Aciditerrimonas	1.47703	1.15509	2.81669	2.75923	0.0325327	0.0284525	0.0169808	0.0331849	0.375854	0.0346149	0.64072	0.423952	0.0315421	0.0420863	0.39732
Arthrobacter	0.372878	0.902154	0.0231826	0.0710227	2.70292	2.73144	1.04338	0.447123	0.119359	0.464829	0.178806	0.0816305	0.0487469	0.960469	0.0877801
Cellvibrio	0.0941245	0.113823	0.00331181	0.00355114	0.00813317	0.00711313	0.00754703	0.00523972	0.299667	0.00988997	0.0447014	2.68854	0.0143373	0.0105216	0.0508201
Shewanella	0.0108605	0.012647	0.00662361	0	0.00271106	0.00711313	0.00377351	0.00873286	0.0838053	0.00494499	0.0178806	0.0131662	2.62947	0.0120247	0.0693001
Haliscomenobacter	0.380118	0.539606	0.00331181	0.00355114	0.0216884	0.0302308	0.433954	0.0227054	1.02852	0.0346149	2.57182	1.28239	0.0143373	0.037577	0.37884
Acidaminobacter	0.0325815	0	0.00827952	0.00710227	0.0189774	0.0284525	0.184902	0.431403	0.231099	1.06812	0.131124	0.0342321	2.52624	0.0751541	0.4389
Sphingopyxis	0.021721	0.0632351	0.0132472	0.0142045	0.0813317	0.0764662	0.352824	0.0890752	0.805038	0.0741748	2.49434	1.09806	0.960601	0.0480986	0.40194
Ilumatobacter	1.04985	0.87686	0.016559	0.0319602	0.173508	0.152932	0.0245278	0.0768492	2.45575	0.0346149	1.81488	1.69317	0.043012	0.037577	1.05336
Longilinea	2.42551	2.45352	0.0264945	0.0142045	2.27458	2.42558	0.76225	0.174657	0.185387	0.0469774	0.199666	0.0579313	0.0286747	0.093191	0.0970201
Propionigenium	0.0144807	0.00843135	0.00496771	0.0142045	0.0108442	0.00889142	0.0660365	0.0419177	0.0482515	2.4181	0.0149005	0.00789973	0.605035	0.241996	0.10626
Caldilinea	0.311335	0.383626	0.016559	0.0177557	2.36133	2.2762	0.122639	0.0192123	0.177769	0.0296699	0.0566218	0.0526648	0.0172048	0.225462	0.0462
Pedobacter	0.510444	1.03706	0.00993542	0.0213068	0.0731985	0.0444571	0.237731	0.174657	1.39675	0.0296699	2.35427	0.845271	0.131903	0.0465955	1.18734
Sulfuritalea	0.173768	0.151764	0.00827952	0.0106534	0.00542211	0.00889142	0.0905643	0.00873286	0.109201	0.16813	2.25295	0.0263324	0.00573493	0.0105216	0.716101
Oxobacter	0.00362017	0.0210784	0.00496771	0	0.0515101	0.037344	0.00566027	0.0174657	0.00507911	0.00494499	0.00596019	0.00263324	0.00286747	2.2456	0.00924001
Dechloromonas	0.0651631	0.0758821	0.00993542	0.00355114	0.0786206	0.0782445	1.82072	0.0803423	1.24692	0.531586	2.21421	0.0526648	0.725469	0.0345709	1.71864
Aquaspirillum	0	0.012647	0.00331181	0.00710227	0.00271106	0.00355657	0.00188676	0.0157192	0.154913	2.20052	0.00894028	0	0.00573493	0.00901849	0.01386
Parabacteroides	0.00362017	0.00843135	0.0016559	0.00710227	0	0.00177828	0.00377351	0.0157192	0.0126978	2.18074	0	0.00789973	0.378505	0.0165339	0
Hydrogenophaga	0.0325815	0.0463724	0.00993542	0.00710227	0.41208	0.451684	0.0283014	2.1675	0.490134	0.0667573	0.241388	0.0947967	0.662385	0.165339	1.20582
Parapedobacter	0.00362017	0	0.00331181	0	0.0271106	0.012448	0	0.0296917	0.0330142	0.0667573	0.00596019	0.0131662	2.15347	0.0526078	0.28644
Nitrosospira	2.15038	1.01176	0.00496771	0.0106534	0.00271106	0.0106697	0.0283014	0.00873286	0.121899	0.0370874	0.137084	0.0895302	0.080289	0.0330678	0.16632
Pedosphaera	0.857981	1.1846	0.927306	2.13778	0.111153	0.11381	0.267919	0.0419177	0.987886	0.252194	0.569198	0.376554	0.0315421	0.0435894	0.2772
Desulfosarcina	0.20273	0.227646	0.0016559	0	0.0379548	0.0160046	2.07355	0.00873286	0.0152373	0.00494499	0.0149005	0	0	0.00901849	0.00462
Rhodobacter	0.0941245	0.0632351	0.0115913	0.0213068	0.162663	0.151154	0.298108	0.410445	2.04942	0.400544	1.26952	0.979566	0.458795	0.159327	1.4553
Methanosaeta	0.0362017	0.830488	0.00993542	0.0142045	1.93027	2.02547	0.669799	0.0768492	0.00761866	0.00988997	0.0149005	0.00526648	0.00286747	0.0435894	0.00462
Wolinella	0.0144807	0.00843135	0.016559	0.0106534	1.95738	1.90276	0.283014	0.012226	0.00507911	0.0222524	0.0149005	0.00789973	0.00573493	0.0105216	0
Geobacter	1.86439	1.23941	0.105978	0.511364	0.66692	0.679304	1.46224	1.49507	0.360617	1.48597	0.503636	0.163261	0.21506	0.798136	0.642181
Sulfurihydrogenibium	0.00362017	0.012647	0	0.00710227	0.097598	0.0622399	0.0660365	0.00349314	0.00507911	0.00741748	0.00596019	0.010533	0.0086024	1.85029	0.01848
Sideroxydans	0.8435	1.83803	0	0.00355114	0.00813317	0.0106697	0.0207543	0.00698629	0.185387	0.00988997	0.137084	0.0236992	0.0143373	0.0315647	0.0785401
Thermomonas	1.81371	0.809409	0.0794834	0.102983	0.0271106	0.0302308	0.0113205	0.234041	0.444422	0.00741748	0.131124	0.0500316	0.372771	0.0225462	0.10626
Limnohabitans	0.00724034	0.012647	0.00331181	0.0106534	0.00542211	0.00533485	0.00188676	0.00523972	0.022856	0.0123625	0.0268208	0.0263324	1.8065	0.0315647	0.1386
Burkholderia	1.77026	1.49235	0.0430535	0.106534	0.0135553	0.0266743	0.0245278	0.0192123	0.363156	0.0346149	0.274169	0.0947967	0.0315421	0.0330678	0.12936
Haliea	0.0724034	0.0548038	0.00496771	0.0177557	0.00271106	0.00533485	0.00188676	0.0454109	1.75229	0.0296699	0.375492	0.218559	0.0315421	0.00751541	0.831601
Paludibacter	0.0181009	0.0548038	0.00496771	0.0106534	0.23044	0.211616	0.684893	0.415684	1.23676	0.768945	0.0208607	0.00789973	1.14125	1.73005	0.47586
Prochlorococcus	0.63353	0.362548	0.104322	0.163352	1.72423	1.40307	0.873568	0.0576369	0.0482515	0.0197799	0.137084	0.0184327	0.0315421	0.0511048	0.03696
Hyphomicrobium	1.42273	1.68627	0.0314622	0.0497159	1.41788	1.41196	1.25092	0.0716095	0.865988	0.170602	1.23078	0.405519	0.0573493	0.0345709	0.46662
Ideonella	0.21359	0.0927448	0.0016559	0.00355114	0.0162663	0.0160046	0.124526	0.0593835	0.220941	1.68624	0.339731	0.165894	0.186385	0.0315647	0.22638
Acidisphaera	0.0832639	0.160196	1.65259	1.23224	0.00542211	0.00355657	0.00566027	0.00523972	0.0152373	0.0271974	0.0506616	0.010533	0.0086024	0.0120247	0.0231
Compostimonas	0.0506824	0.0379411	0.00827952	0.0142045	0.0298216	0.0320091	0.0584895	0.37202	0.726312	0.0914823	0.0208607	0.260691	0.0286747	1.53916	0.3234
Desulfocapsa	0.0289614	0.0674508	0.00662361	0.00355114	0.0433769	0.0409005	0.916964	0.581609	0.0203164	0.0197799	0.0119204	0.00789973	0.00286747	1.52112	0.0785401
Terriglobus	0.340296	0.265587	1.14257	1.51989	0.0135553	0.00889142	0	0.00349314	0.0152373	0.00494499	0.0983431	0.0289657	0.00573493	0.00901849	0
Pseudomonas	0.571987	1.17196	0.0778275	0.0639205	0.0271106	0.0462354	0.258486	0.255	1.51611	0.0939548	0.476815	0.603012	0.82583	0.123253	0.43428
Lewinella	0.141187	0.109608	0.00496771	0.00710227	0.0162663	0.0177828	0.362257	0.0279452	0.698377	0.00988997	1.37382	0.821572	0.0086024	0.0225462	0.531301
Actibacter	0.00724034	0	0.0016559	0	0	0.00355657	0.00188676	0.048904	1.36882	0	0.00894028	0.00526648	0.00286747	0.00450924	0.0693001
Ferruginibacter	0.152047	0.151764	0.00331181	0.0213068	0.146397	0.129815	0.00754703	0.00523972	0.106661	0.0173075	1.34104	0.337055	0.0516144	0.0225462	0.1848
Conexibacter	1.3286	1.29	0.0662361	0.0745739	0.0243995	0.0337874	0.00566027	0.00174657	0.238718	0.00741748	0.289069	0.0737308	0.0114699	0.0315647	0.0739201
Chthoniobacter	0.0253412	0.0210784	0.0728597	0.053267	0.0786206	0.0800228	0.0339616	0.00349314	0.0812657	1.29311	0.202646	0.0394986	0.00286747	0.00150308	0.0462
Rhodomicrobium	0.278753	0.236078	0.0761716	0.181108	1.28233	1.19501	0.611309	0.00698629	0.0609493	0.0593398	0.298009	0.0526648	0.0258072	0.0240493	0.04158
Leptothrix	0.133946	0.0843135	0.0132472	0.00355114	0.0135553	0.00711313	0.0301881	0.0401712	0.144755	0.0222524	1.2725	0.508216	1.24161	0.0240493	0.48048
Palmaria	0.0108605	0	0.00662361	0	0.00271106	0.00533485	0.00566027	0.00174657	0.00253955	0.00247249	0.00596019	1.26659	0	0.00150308	0
Microvirgula	0	0	0.00331181	0	0	0	0	0	0.00761866	1.26344	0.00596019	0.00263324	0	0.00150308	0.00462
Thiovirga	0.00362017	0.00421567	0.00496771	0.0106534	0.0135553	0.012448	0.0377351	0.359794	0.00761866	0.0642848	0.00596019	0.00263324	0.00573493	1.23553	0.01848
Byssovorax	0.188249	0.172843	0.826296	1.22869	0.140975	0.122702	0.556593	0.00523972	0.0330142	0.0222524	0.0417213	0.010533	0.00573493	0.0255524	0.01386
Desulfonatronum	0	0.00843135	0	0	0.0216884	0.0337874	1.22451	0	0	0.00494499	0.00298009	0	0.00286747	0.00300616	0
Prolixibacter	0.318575	1.21411	0.00331181	0.0106534	0.504256	0.419675	0.505651	0.167671	0.022856	0.435159	0.0238407	0.00789973	0.338361	0.190891	0.17556
Xanthomonas	0.21359	0.653429	0.00827952	0.0213068	0.0271106	0.012448	0.0264146	0.0314383	1.19867	0.014835	0.262248	0.113229	0.140506	0.0150308	0.44352
Ignavibacterium	1.19828	1.10451	0.00331181	0.00355114	0.10302	0.0995839	0.816966	0.592088	0.121899	0.0197799	0.0417213	0.00526648	0.0143373	0.0390801	0.03234
Chondrus	0.00362017	0	0.00331181	0	0	0	0.00566027	0.00349314	0	0.00247249	0.00298009	1.18759	0.00286747	0.00150308	0
Aquimonas	0.00362017	0	0.0016559	0.00355114	0	0.00355657	1.17922	0.036678	0.0406329	0.00494499	0.0834426	0.0210659	0.00286747	0.315647	0.0739201
Okeania	0	0	0	0	0.00271106	0.00177828	1.17922	0	0.00507911	0.00247249	0	0.00263324	0	0.00601233	0
Sterolibacterium	1.1657	0.257156	0.0016559	0.00355114	0.00271106	0.00355657	0.0320749	0.00523972	0.0558702	0.00741748	0.0685421	0.00789973	0.00573493	0.00901849	0.04158
Terrimonas	0.756616	0.333038	0.067892	0.0426136	0.0460879	0.024896	0.0132073	0.0296917	0.744089	0.014835	1.16522	0.260691	0.0286747	0.0105216	0.22176
Actinomadura	0.0506824	0.0632351	1.15748	0.0674716	0.0352437	0.0195611	0.00566027	0.00349314	0.00507911	0	0.00596019	0.00526648	0.0086024	0.00300616	0.00924001
Methylocapsa	0.0832639	0.025294	0.0629243	0.0319602	0.0379548	0.0551268	0.0132073	0.012226	0.0380933	1.15218	0.157945	0.0315989	0.0114699	0.0135277	0.0231
Modestobacter	0.0941245	0.0463724	0.00331181	0.00355114	0.00813317	0.0160046	0.00188676	0.0471575	1.14534	0.0123625	0.0298009	0.0184327	0	0	0.0739201
Vogesella	0.00724034	0.012647	0.00662361	0.00355114	0.00271106	0.00533485	0.0886776	0.0174657	1.12756	0.880208	0.372512	0.0315989	0.986408	0.00601233	0.03234
Petrimonas	0.756616	1.11294	0.00496771	0.0710227	0.132842	0.167159	0.118866	0.00873286	0.022856	0.00741748	0.0506616	0.00789973	0	0.0240493	0.01386
Ohtaekwangia	1.04985	0.548038	0.0496771	0.0852273	0.0135553	0.00889142	0.216977	0.0104794	0.619651	0.0370874	0.998331	0.502949	0.0286747	0.0240493	0.4389
Thiorhodospira	0.818159	1.02862	0.0016559	0	0.00271106	0.00177828	0.0320749	0.0139726	0.0279351	0.00741748	0.0685421	0.0184327	0.0114699	0.0225462	0.02772
Methylibium	0.155667	0.105392	0.0016559	0.00355114	0.00813317	0.012448	0.0358484	0.0174657	0.198085	0.0469774	1.02813	0.144828	0.0401445	0.00601233	0.30492
Anaerolinea	1.00279	0.834703	0.00827952	0.0177557	0.74554	0.786001	0.658478	0.158938	0.0584097	0.0618123	0.205626	0.0605646	0.00286747	0.166842	0.0831601
Gemmata	0.532165	0.269803	0.854446	0.997869	0.0271106	0.0302308	0.00943378	0.00174657	0.355537	0.0296699	0.300989	0.18696	0.0229397	0.0195401	0.19404
Nitratiruptor	0.0108605	0.00421567	0.00331181	0.00355114	0.00271106	0.00177828	0.0792438	0.0261986	0.00507911	0.00741748	0.0119204	0	0	0.978506	0
Thermoanaerobacter	0.155667	0.0800978	0.00496771	0.0106534	0.970558	0.930042	0.0301881	0.00698629	0.0101582	0.00741748	0.0208607	0.00526648	0.00573493	0.0120247	0
Thermoplasma	0.00724034	0.00421567	0.970359	0.71733	0	0	0.0113205	0.00174657	0.00253955	0	0	0	0.00573493	0	0
Novosphingobium	0.0289614	0.0337254	0.0215267	0	0.0840427	0.0764662	0.00754703	0.0104794	0.137136	0.0642848	0.96853	0.331788	0.630842	0.00601233	0.04158
Sphingomonas	0.115845	0.101176	0.00662361	0.0106534	0.241284	0.22762	0.126413	0.0349314	0.190467	0.472246	0.96555	0.816305	0.478867	0.0330678	0.12474
Methylobacterium	0.944865	0.737743	0.00496771	0.00710227	0.0189774	0.00889142	0.0188676	0	0.045712	0.00247249	0.0268208	0.0236992	0.00286747	0.00450924	0.00462
Aquabacterium	0.445281	0.168627	0.00662361	0.0355114	0.0243995	0.0409005	0.0886776	0.253253	0.599335	0.0494499	0.938729	0.413419	0.470264	0.0225462	0.637561
Bradyrhizobium	0.934004	0.653429	0.44875	0.756392	0.0786206	0.0693531	0.241505	0.00523972	0.0431724	0.0964272	0.31589	0.189593	0.0172048	0.0195401	0.0508201
Anaeromyxobacter	0.926764	0.417352	0.110946	0.170455	0.0515101	0.0604616	0.0905643	0.0471575	0.101582	0.0494499	0.31291	0.126396	0.0086024	0.0496017	0.0600601
Dehalococcoides	0.814539	0.919017	0.00331181	0.00710227	0.750962	0.882029	0.477349	0.0349314	0.11428	0.0445049	0.0745023	0.0394986	0.0114699	0.036074	0.01848
Nitratireductor	0.275133	0.248725	0.00331181	0.0106534	0.00271106	0.0106697	0.0377351	0.00523972	0.0914239	0.0420324	0.908928	0.165894	0.0114699	0.00450924	0.22638
Microcystis	0.0579227	0.00843135	0.0016559	0	0	0.00533485	0	0.0436643	0.327602	0	0.223507	0.0579313	0.0344096	0.907861	0.0877801
Rhizobium	0.191869	0.18549	0.213612	0.433239	0.816028	0.905146	0.560367	0.0646232	0.159992	0.222524	0.214567	0.0552981	0.0917589	0.0240493	0.0600601
Aquincola	0.597328	0.236078	0.00496771	0.00710227	0.0216884	0.0142263	0.126413	0.139726	0.888844	0.0197799	0.822506	0.355488	0.086024	0.0300616	0.526681
Acidovorax	0.191869	0.231862	0.00496771	0	0.00813317	0.0142263	0.00943378	0.036678	0.873606	0.0791198	0.813565	0.226459	0.64518	0.118743	0.44352
Flexibacter	0.865221	0.822056	0.0761716	0.145597	0.0596432	0.0657965	0.0377351	0.0593835	0.772024	0.0370874	0.548337	0.334422	0.0172048	0.0390801	0.31416
Chitinophaga	0.304094	0.160196	0.153999	0.170455	0.0271106	0.0177828	0.0188676	0.00698629	0.147294	0.0197799	0.864227	0.200126	0.0401445	0.0120247	0.10164
Levilinea	0.763856	0.864213	0.00331181	0.00355114	0.165374	0.188498	0.171695	0.0261986	0.0660284	0.13846	0.0923829	0.0236992	0.0086024	0.036074	0.01386
Sulfurimonas	0.00724034	0.0379411	0.00662361	0.00355114	0.653364	0.613508	0.0377351	0.806916	0.0203164	0.0271974	0.00298009	0.00526648	0.0086024	0.661356	0.863941
Planctomyces	0.481483	0.375195	0.114257	0.22017	0.0813317	0.0586834	0.860361	0.0174657	0.325063	0.014835	0.372512	0.27649	0.0286747	0.0150308	0.22176
Frankia	0.734895	0.859997	0.00496771	0	0.00271106	0	0.00566027	0.00523972	0.0253955	0.00741748	0.0208607	0.00526648	0.00573493	0.018037	0
Solitalea	0.0724034	0.101176	0.086107	0.078125	0.479857	0.41434	0.330182	0.62178	0.17015	0.182965	0.214567	0.0263324	0.0172048	0.799639	0.845461
Solirubrobacter	0.771097	0.826272	0.478556	0.770597	0.0867538	0.0711313	0.0566027	0.0349314	0.0152373	0.0321424	0.0596019	0.0157995	0.0114699	0.0225462	0.03696
Elusimicrobium	0.0543026	0.0590194	0.0629243	0.823864	0.121998	0.0782445	0.0415087	0.347568	0.00253955	0.0791198	0.00894028	0	0.00286747	0.216444	0.00924001
Pelobacter	0.477863	0.822056	0.0115913	0.0142045	0.0731985	0.0586834	0.109432	0.0139726	0.121899	0.113735	0.00894028	0.0210659	0.0086024	0.0225462	0.02772
Ferrimicrobium	0.818159	0.657645	0.592813	0.482955	0.00542211	0.0177828	0.00566027	0.00174657	0.0406329	0.00494499	0.0894028	0.0500316	0.0086024	0.0165339	0.02772
Rheinheimera	0.00362017	0.00421567	0.0016559	0.00355114	0.0108442	0.024896	0.0113205	0.0209589	0.650126	0.00988997	0.128144	0.255424	0.81436	0.0255524	0.21252
Crenothrix	0.0362017	0.012647	0.00496771	0	0.813317	0.78778	0.0245278	0	0.0380933	0.00988997	0.149005	0.010533	0.00286747	0.00150308	0.1155
Azospirillum	0.242551	0.370979	0.321245	0.806108	0.0650653	0.0782445	0.0905643	0.0104794	0.0507911	0.210162	0.062582	0.010533	0.0544818	0.055614	0.00924001
Haliangium	0.803678	0.429999	0.0413976	0.0674716	0.00813317	0.0195611	0.0509424	0.0157192	0.0203164	0.0123625	0.0596019	0.09743	0.00573493	0.0165339	0.21714
Thermacetogenium	0.0144807	0.00421567	0.351051	0.802557	0.33346	0.245403	0.0226411	0.00349314	0.00507911	0.00494499	0	0	0.00286747	0.00300616	0.00462
Beggiatoa	0.253412	0.800978	0.00496771	0	0	0.00533485	0.0396219	0.00349314	0.0838053	0.00494499	0.0119204	0.010533	0.00573493	0.0165339	0.03696
Curvibacter	0.0470622	0.0590194	0.00662361	0.00355114	0.0108442	0.00533485	0.0264146	0.024452	0.0304746	0.00741748	0.598999	0.20276	0.269542	0.790621	0.14322
Bdellovibrio	0.21359	0.160196	0.067892	0.106534	0.187063	0.163602	0.198109	0.0192123	0.784722	0.0593398	0.375492	0.268591	0.0172048	0.0135277	0.2541
Acholeplasma	0.00724034	0.00421567	0.0016559	0.00355114	0.0162663	0.0142263	0.116979	0.778971	0.00761866	0.00247249	0.00298009	0	0.00573493	0.00300616	0
Anoxybacillus	0.0144807	0.012647	0	0.00710227	0.0325327	0.0284525	0.764137	0.0349314	0.0711075	0.00741748	0.0387412	0.010533	0.0143373	0.00150308	0.0508201
Rhizomicrobium	0.0253412	0.0463724	0.0579566	0.269886	0	0.00533485	0.752816	0	0	0.00988997	0.00596019	0.00789973	0.00286747	0	0
Saccharibacter	0.00724034	0.0295097	0.00662361	0.0213068	0.0731985	0.0764662	0.299994	0.0209589	0.383473	0.0173075	0.739063	0.184327	0.00573493	0.0165339	0.0877801
Hirschia	0.133946	0.177058	0	0.00355114	0.0243995	0.0177828	0.00943378	0.00698629	0.144755	0.0469774	0.730123	0.215926	0.0401445	0.00300616	0.14784
Desulfovibrio	0.119466	0.0421567	0.0182149	0.0106534	0.0623543	0.0604616	0.726401	0.11702	0.0101582	0.356039	0.0149005	0.00789973	0.00286747	0.0105216	0.01848
Candidatus Nitrosocaldus	0.126706	0.72088	0.24673	0.450994	0.0162663	0.012448	0.0339616	0.00523972	0	0.00741748	0.00596019	0.00263324	0.00286747	0.0270555	0
Fibrobacter	0.0868841	0.122255	0.00662361	0.0142045	0.0243995	0.00533485	0.541499	0.0296917	0.716154	0.00494499	0.181786	0.0394986	0.0086024	0.018037	0.0646801
Halothiobacillus	0.00362017	0.00421567	0	0	0.00271106	0.00177828	0.00377351	0.0349314	0	0.00247249	0.00894028	0.00263324	0.00286747	0.695927	0
Methanococcus	0.166528	0.535391	0.00662361	0.00710227	0.0108442	0.00533485	0.690553	0.0314383	0.00761866	0.00247249	0.00596019	0.0131662	0	0.0285585	0.01848
Desulfobacca	0.398219	0.18549	0.0016559	0.00710227	0.601854	0.689974	0.0905643	0.0296917	0.0126978	0.13846	0.0208607	0.00263324	0.00286747	0.0105216	0.00924001
Thiobacter	0.684212	0.303529	0	0	0.00271106	0	0.00188676	0.00349314	0.0279351	0	0.0447014	0.0210659	0.00286747	0.00901849	0.01386
Caulobacter	0.0506824	0.0716665	0.510018	0.369318	0.0108442	0.0195611	0.00566027	0.0139726	0.0380933	0.0247249	0.664561	0.0289657	0.0688192	0.00450924	0.02772
Syntrophobacter	0.0760236	0.143333	0.0447094	0.0177557	0.661498	0.622399	0.14528	0.00174657	0.0126978	0	0.00596019	0.00526648	0.00286747	0.00450924	0.01848
Ornatilinea	0.228071	0.210784	0	0	0.620832	0.656187	0.0641497	0.0593835	0.00253955	0.0271974	0.0238407	0.00526648	0	0.0165339	0.00924001
Zavarzinella	0.20273	0.130686	0.65077	0.617898	0.0569322	0.0675748	0.00754703	0.0192123	0.109201	0.0519224	0.157945	0.0921635	0.0114699	0.00450924	0.01386
Pseudorhodobacter	0.0108605	0.025294	0.00331181	0.00355114	0.0135553	0.00711313	0.0132073	0.0768492	0.231099	0.0173075	0.274169	0.213293	0.648047	0.485495	0.3234
Geothermobacter	0.644391	0.307744	0	0	0	0.00177828	0.0132073	0.00523972	0.0914239	0	0.0506616	0.00526648	0.0114699	0.0105216	0.0970201
Erysipelothrix	0.00362017	0.00843135	0.0016559	0.00710227	0.0650653	0.0586834	0.00754703	0.523972	0.642507	0.0667573	0.0149005	0.00263324	0.0286747	0.444912	0.0646801
Fodinicola	0.514064	0.640782	0.0182149	0.0177557	0.0271106	0.0106697	0.00377351	0.00174657	0.00507911	0	0.00596019	0.00263324	0.0143373	0.0120247	0
Methylophilus	0.0362017	0.0168627	0.0016559	0	0	0.00177828	0.218864	0.00523972	0.0177769	0.00741748	0.110263	0.339688	0.0659517	0.00901849	0.623701
Stella	0.181009	0.619704	0.268256	0.539773	0.00813317	0.00889142	0.320749	0.00174657	0.00761866	0.00741748	0.0178806	0.0184327	0.0114699	0.0195401	0.00924001
Acidothermus	0.604569	0.240293	0.00827952	0.00355114	0	0.00355657	0	0.00349314	0.0736471	0.00494499	0.0178806	0.0131662	0.00286747	0.00601233	0.0231
Fluviicola	0.249792	0.181274	0.0546448	0.0710227	0.0108442	0.0142263	0.0113205	0.0803423	0.213322	0.00988997	0.601979	0.231725	0.0229397	0.19991	0.24024
Agromyces	0.0108605	0.00843135	0.0016559	0.00710227	0.601854	0.556603	0.0113205	0.00174657	0.0101582	0.00741748	0.00298009	0.00263324	0.00286747	0.00751541	0.00462
Methyloversatilis	0.0289614	0.0295097	0.0016559	0	0.0216884	0.012448	0.584895	0.00523972	0.0304746	0.0123625	0.149005	0.0526648	0	0.00150308	0.0831601
Methylosinus	0.387358	0.581763	0.00331181	0.0674716	0.0271106	0.0320091	0.0830173	0.00523972	0.109201	0.0445049	0.131124	0.0157995	0.0172048	0.0150308	0.0693001
Pedomicrobium	0.579227	0.552253	0.0115913	0.0639205	0.0515101	0.0355657	0.398106	0.00523972	0.0355537	0.0123625	0.0506616	0.0210659	0.00573493	0.0150308	0.00924001
Pirellula	0.575607	0.379411	0.00993542	0.0106534	0.0271106	0.0515702	0.350937	0.024452	0.449501	0.00988997	0.289069	0.321256	0.0659517	0.0195401	0.31878
Magnetospirillum	0.0108605	0.00843135	0.0894188	0.564631	0.00542211	0.00533485	0.0962246	0.00698629	0.00507911	0.205217	0.0119204	0.00526648	0	0.00150308	0.01386
Nitratifractor	0	0.012647	0	0	0.0108442	0.0195611	0.0433954	0.048904	0.00253955	0.17802	0.00298009	0	0.0172048	0.559146	0.00462
Pontibacter	0.00724034	0	0	0	0.00542211	0.00889142	0.00943378	0.543184	0.0177769	0.0494499	0.0715222	0.0289657	0.00286747	0.0105216	0.0508201
Mesorhizobium	0.119466	0.0969605	0.0016559	0	0.170797	0.193833	0.541499	0.012226	0.0812657	0.0197799	0.390392	0.181694	0.0688192	0.0240493	0.0877801
Leptospira	0.0325815	0.0421567	0.0016559	0	0.0379548	0.0284525	0.537726	0.036678	0	0.0321424	0.149005	0.00789973	0.00286747	0.00901849	0.0693001
Rhodothermus	0.0289614	0.012647	0.107634	0.536222	0.00271106	0.00355657	0.403766	0.00349314	0	0	0.00298009	0.00263324	0	0.00150308	0.00462
Gaiella	0.532165	0.257156	0	0	0.00813317	0.00355657	0	0.00873286	0.0584097	0	0.065562	0.0289657	0	0.00601233	0.03696
Thermus	0.253412	0.151764	0.0745156	0.0852273	0.0189774	0.0302308	0.526405	0.00523972	0.259034	0.00494499	0.125164	0.0500316	0.0286747	0.00601233	0.10626
Chromobacterium	0.00724034	0.00421567	0.524921	0.0852273	0	0	0	0	0.00253955	0.00247249	0	0	0	0	0.00924001
Telmatobacter	0	0.00843135	0.524921	0.3125	0	0.00177828	0	0	0	0	0.0119204	0	0	0	0
Rhodocyclus	0.0506824	0.0716665	0.00331181	0	0.0460879	0.0284525	0.0301881	0.024452	0.0812657	0.0741748	0.0357611	0.0131662	0.519011	0.0195401	0.15246
Chelatococcus	0.0108605	0.00421567	0.00331181	0	0.0108442	0.0142263	0.00377351	0	0.0431724	0.0247249	0.131124	0.518749	0.0544818	0	0.03234
Actinomyces	0.173768	0.518528	0.0016559	0	0	0.00177828	0.00377351	0	0.0253955	0.00247249	0.0178806	0	0	0.0150308	0
Chloroflexus	0.289614	0.396273	0	0.00710227	0.517812	0.458797	0.143394	0.0139726	0.0685679	0.328842	0.193706	0.121129	0.0086024	0.0270555	0.04158
Streptomyces	0.275133	0.18549	0.0430535	0.0177557	0.157241	0.152932	0.132073	0.048904	0.515529	0.0296699	0.193706	0.142195	0.0200723	0.0135277	0.18942
Nitrososphaera	0	0.0168627	0.259977	0.507812	0.00271106	0.00177828	0	0	0.00507911	0.00247249	0.00298009	0	0.00286747	0	0
Riemerella	0.00362017	0	0	0	0	0	0	0.00523972	0.00507911	0	0.00298009	0	0.504674	0	0
Ochromonas	0.0108605	0.00421567	0.00331181	0	0.00271106	0.00711313	0.00188676	0.00174657	0.0482515	0.014835	0.0596019	0.010533	0.00286747	0.0240493	0.49896
Pinus	0.00724034	0.00421567	0.480212	0.490057	0	0.00177828	0.00188676	0.00523972	0.00253955	0.00988997	0.00894028	0	0	0.00300616	0.00462
Desulfuromonas	0.488723	0.28245	0	0.00355114	0	0.00533485	0.294334	0.0401712	0.0507911	0.0395599	0.0804625	0.0210659	0.00573493	0.0105216	0.01848
Niastella	0.289614	0.227646	0.00827952	0.365767	0.00813317	0	0.00566027	0.0104794	0.0507911	0.014835	0.473835	0.0816305	0.0086024	0.00901849	0.0554401
Desulfomonile	0.104985	0.0421567	0.0115913	0.00355114	0.30906	0.272077	0.471689	0.012226	0.0253955	0.101372	0.00894028	0.00526648	0	0.00601233	0
Syntrophus	0.260652	0.46794	0.0231826	0.0319602	0.157241	0.147598	0.154714	0.0209589	0.00761866	0	0.0238407	0.00526648	0.00573493	0.0300616	0
Sediminibacterium	0.0434421	0.0505881	0.0198708	0.0213068	0.00813317	0.0106697	0.0679232	0.048904	0.203164	0.00988997	0.464895	0.152728	0.0344096	0.00150308	0.0831601
Anaerophaga	0.0362017	0.0210784	0.00331181	0.00355114	0.241284	0.172494	0.347163	0.291678	0.00507911	0.464829	0.0149005	0.00789973	0.0258072	0.0511048	0.2079
Stephanodiscus	0.00724034	0.00421567	0.00496771	0.00355114	0.00542211	0.00177828	0.00377351	0.464588	0.190467	0.00247249	0.116224	0.231725	0.0143373	0.0150308	0.26796
Dietzia	0.0434421	0.0379411	0.0016559	0	0.371415	0.451684	0.0339616	0.00873286	0	0.00988997	0	0.00263324	0	0.00450924	0.00924001
Leptolinea	0.0253412	0.0379411	0.00331181	0.00355114	0.447324	0.430345	0.383012	0.0192123	0	0.0395599	0.00894028	0	0.0086024	0.0135277	0.00462
Lysobacter	0.0181009	0.012647	0.00993542	0.0142045	0.00271106	0.00355657	0.441501	0.024452	0.253955	0.0271974	0.429133	0.086897	0.0401445	0.255524	0.0924001
Oceanibaculum	0.0398219	0.43843	0	0.024858	0.00271106	0.00177828	0.0264146	0.00174657	0.0253955	0	0.00596019	0.00789973	0	0.0135277	0.00462
Singulisphaera	0.021721	0.0168627	0.435503	0.110085	0.00271106	0.0231177	0	0.00523972	0.0203164	0.0321424	0.00596019	0.0184327	0.0114699	0	0.00462
Derxia	0.021721	0.0168627	0.0380858	0.433239	0.0460879	0.0640182	0.00943378	0.00698629	0.167611	0	0.0506616	0	0.0086024	0.0150308	0.02772
Polaromonas	0.0325815	0.012647	0.00331181	0	0.189774	0.167159	0	0.00349314	0.00761866	0.00247249	0.0596019	0.0921635	0.114699	0.431384	0.01848
Sphaerotilus	0.0253412	0.00421567	0	0	0.00271106	0.00889142	0.0188676	0.00523972	0.137136	0	0.283109	0.28439	0.0086024	0.00150308	0.42504
Helicobacter	0.231691	0.109608	0.0215267	0.0355114	0.317194	0.337874	0.420747	0.0384246	0.388552	0.0173075	0.0238407	0.00526648	0.361301	0.0691417	0.00924001
Ferribacterium	0.0253412	0.00421567	0	0	0	0.00177828	0	0.00174657	0.0152373	0.00988997	0.420193	0.0895302	0.0086024	0	0.02772
Arcicella	0.00724034	0	0	0	0.00271106	0.00355657	0.00377351	0.00174657	0.0152373	0.00494499	0.151985	0.416052	0.149108	0.00150308	0.01386
Woodsholea	0.166528	0.143333	0.0016559	0	0.00271106	0	0.00566027	0	0.11174	0.014835	0.414233	0.131662	0.0143373	0.00601233	0.16632
Comamonas	0.00362017	0	0.00331181	0	0.00542211	0.00889142	0	0.0978081	0.39617	0.222524	0.0119204	0.0157995	0.412915	0.00300616	0.0600601
Phaselicystis	0.405459	0.0969605	0	0.00355114	0.00271106	0	0.00566027	0	0.0126978	0	0	0.010533	0.00286747	0	0.00462
Desulfobacula	0.00362017	0	0	0	0.00271106	0.00177828	0.398106	0	0.00253955	0	0	0	0.00286747	0.00150308	0
Actinoplanes	0.191869	0.0632351	0.00662361	0.0106534	0.0406658	0.0213394	0.0113205	0.0157192	0.39617	0.00247249	0.0774824	0.0157995	0.00573493	0.00150308	0.0462
Alkaliflexus	0.394599	0.278234	0.00331181	0.024858	0.0271106	0.024896	0.0396219	0.0576369	0.00507911	0.0766473	0.00298009	0.00789973	0.151976	0.0255524	0.02772
Nordella	0.267893	0.15598	0.00496771	0.00710227	0.00813317	0	0.00377351	0.0401712	0.304746	0.0370874	0.378472	0.118496	0.0143373	0.00300616	0.3927
Dehalogenimonas	0.267893	0.392058	0.00496771	0	0.0623543	0.0497919	0.00754703	0.00873286	0	0.0123625	0.0178806	0.010533	0	0.0105216	0.00462
Gallionella	0.390979	0.248725	0.0016559	0	0	0.00177828	0.00566027	0.00174657	0.0101582	0.00741748	0.143044	0.00263324	0.00286747	0.0105216	0.02772
Cupriavidus	0.307715	0.387842	0	0.174006	0	0	0	0.00174657	0.0152373	0.0445049	0.0238407	0.0421319	0.0086024	0.00601233	0.00462
Cellulomonas	0.0325815	0.0337254	0.00496771	0	0.322616	0.385888	0.00377351	0.0104794	0.0126978	0.11868	0.0178806	0.010533	0.0086024	0.018037	0.00924001
Methylomonas	0.00362017	0.0210784	0.0016559	0	0	0.00177828	0.0566027	0.012226	0.00761866	0	0.107283	0	0	0.0165339	0.38346
Bazzania	0	0.00421567	0.380858	0	0	0.00177828	0.00188676	0	0	0	0	0.00526648	0.0200723	0.00300616	0.00462
Desulfobacterium	0.0362017	0.0632351	0.0016559	0	0.0813317	0.0551268	0.379238	0.0157192	0.00507911	0.0296699	0.00596019	0	0.0086024	0.0105216	0.0600601
Leptolyngbya	0.00724034	0.00421567	0.00331181	0.00355114	0.0108442	0.0177828	0.0679232	0.0192123	0.121899	0	0.375492	0.131662	0.0315421	0.0150308	0.10164
Prosthecochloris	0	0.00421567	0	0	0.00271106	0	0.371691	0	0	0	0	0	0	0	0
Rhodococcus	0.166528	0.0800978	0.0314622	0.12429	0.0596432	0.0729096	0.00188676	0.00349314	0.0634888	0.0197799	0.366551	0.129029	0.0143373	0.00751541	0.0554401
Fusobacterium	0.0470622	0.0505881	0.362643	0.365767	0.00271106	0.00177828	0.175468	0.0157192	0.0126978	0.00988997	0.0357611	0.0342321	0.0114699	0.00901849	0.00462
Chondromyces	0.365637	0.286666	0.177182	0.209517	0.0135553	0.00177828	0.0641497	0.00349314	0.0634888	0.0197799	0.0596019	0.115863	0.00573493	0.00300616	0.0554401
Iamia	0.365637	0.362548	0.034774	0.024858	0.0840427	0.0551268	0.00188676	0.00523972	0.159992	0.0123625	0.122184	0.107963	0.00286747	0.00751541	0.0554401
Nannocystis	0.166528	0.113823	0.00331181	0.00710227	0.0189774	0.0213394	0.0113205	0.0139726	0.0685679	0.00988997	0.160925	0.184327	0.00573493	0.00601233	0.36498
Beijerinckia	0.0144807	0.0210784	0.0115913	0.0461648	0.00542211	0.0106697	0.364144	0	0.0203164	0.18791	0.149005	0.0447651	0.0114699	0.00150308	0.0508201
Rhodovastum	0.0289614	0.0295097	0.362643	0.340909	0.00542211	0.00355657	0.00377351	0.00698629	0.0482515	0	0.032781	0.0263324	0.00573493	0.00450924	0.00462
Devosia	0.358397	0.25294	0.0380858	0.0106534	0.0325327	0.0409005	0.111319	0.0628766	0.045712	0.0593398	0.181786	0.107963	0.00286747	0.0120247	0.03696
Sporichthya	0.177388	0.274019	0.00331181	0.00710227	0.0569322	0.0320091	0.0150941	0.0174657	0.358077	0.0123625	0.262248	0.181694	0.00286747	0.0120247	0.12936
Spirochaeta	0.275133	0.349901	0.0430535	0.024858	0.168085	0.110254	0.35471	0.124007	0.00507911	0.113735	0.00894028	0.0131662	0.00286747	0.0511048	0.10626
Saccharopolyspora	0.00362017	0	0	0	0.28195	0.353878	0	0	0	0	0	0	0.00573493	0	0
Pelomonas	0.021721	0.0168627	0	0.00355114	0	0.00177828	0.00566027	0.00523972	0.0406329	0.0321424	0.214567	0.313356	0.352698	0.00601233	0.0462
Desulfofustis	0.0470622	0.160196	0	0.00710227	0.254839	0.216951	0.341503	0.00174657	0	0.00494499	0.00596019	0	0.00286747	0	0.00462
Bacillus	0.112225	0.206568	0.00496771	0	0.0759096	0.0729096	0.116979	0.130993	0.337761	0.0395599	0.0387412	0.0421319	0.080289	0.00601233	0.01848
Methylotenera	0.0108605	0.00421567	0	0.00355114	0.00271106	0	0.337729	0.00698629	0.0101582	0.00494499	0.190726	0.09743	0.0602168	0.0195401	0.231
Runella	0	0	0.0016559	0	0.00813317	0	0.0471689	0.00523972	0.0279351	0.00494499	0.0596019	0.334422	0.0315421	0.00450924	0.0646801
Reyranella	0.224451	0.333038	0.0364299	0.120739	0.00542211	0.012448	0.0113205	0.00349314	0.0660284	0.00988997	0.157945	0.0289657	0.0143373	0.00751541	0.0924001
Porphyrobacter	0.166528	0.164411	0.00827952	0	0.0921759	0.0995839	0.0226411	0.23928	0.332682	0.0222524	0.244368	0.0394986	0.206458	0.0826695	0.10164
Thermogymnomonas	0.00724034	0.0463724	0.0016559	0.00355114	0.328038	0.277412	0.00188676	0.00698629	0	0.00247249	0	0	0.00286747	0.00150308	0
Methylophaga	0	0.0210784	0.0016559	0	0.00271106	0.00177828	0.0433954	0.0523972	0	0	0	0	0.00286747	0.324666	0.0231
Brevifollis	0	0	0.00331181	0	0.28195	0.323648	0.0113205	0.00174657	0	0.00247249	0	0	0	0	0.00462
Alkanindiges	0.0941245	0.0716665	0.00496771	0	0	0	0	0.00349314	0.157452	0	0.154965	0.0368654	0.321156	0.00300616	0.0600601
Hymenobacter	0	0.00421567	0.0016559	0	0	0.00711313	0	0.0227054	0.0304746	0.00247249	0.0119204	0.010533	0.318289	0.00150308	0
Algoriphagus	0.0144807	0.0969605	0.0016559	0	0.0189774	0.012448	0.00188676	0.0104794	0.317444	0	0.0506616	0.0157995	0.0114699	0.00601233	0.01386
Thiomonas	0	0.00421567	0	0	0.116575	0.0871359	0.00754703	0.0646232	0	0.0840648	0.032781	0	0	0.312641	0
Amaricoccus	0.311335	0.172843	0	0	0.0135553	0.0337874	0	0.00349314	0.0330142	0.111262	0.143044	0.0579313	0.00573493	0.00300616	0.0508201
Erythrobacter	0.0289614	0.025294	0.0115913	0	0.0948869	0.0906925	0.0283014	0.012226	0.0761866	0.0247249	0.30695	0.0789973	0.301084	0.0285585	0.0739201
Alistipes	0	0.00843135	0	0	0	0	0.00566027	0.241027	0.0126978	0	0.00596019	0.00789973	0.306819	0.00150308	0.00924001
Seirospora	0	0	0	0.00355114	0	0	0	0.00873286	0	0.301644	0	0	0.00286747	0.036074	0
Acidipila	0	0	0.299718	0.230824	0	0.00355657	0	0.00174657	0	0.0370874	0.00298009	0	0	0	0
Pleomorphomonas	0	0	0	0	0	0.00177828	0	0	0	0.299172	0.00298009	0.00263324	0	0.00150308	0
Pseudolabrys	0.228071	0.295097	0.0563007	0.0710227	0.00813317	0.0106697	0.0169808	0	0.00761866	0.0271974	0.0149005	0.00526648	0	0.00601233	0.00924001
Flavisolibacter	0.0687833	0.0927448	0.283159	0.284091	0.00271106	0.00177828	0.00188676	0.00174657	0.124438	0.00494499	0.292049	0.0789973	0.00573493	0.00450924	0.00924001
Hyaloscypha	0.00362017	0.00421567	0.10929	0.287642	0.00271106	0.00711313	0	0.00174657	0	0.0321424	0.0208607	0.00789973	0.00286747	0.00150308	0
Inhella	0.00362017	0.00843135	0.00331181	0	0	0	0.0245278	0.00174657	0.17015	0.0123625	0.286089	0.086897	0.0286747	0	0.04158
Acidimicrobium	0.0941245	0.113823	0.283159	0.184659	0.00813317	0.00711313	0.00566027	0.00523972	0.0330142	0	0.0596019	0.150095	0.00573493	0.00300616	0.03696
Lacibacter	0.00724034	0.012647	0	0.00355114	0	0.00355657	0.00188676	0.00349314	0.129517	0	0.283109	0.0500316	0.0172048	0	0.03696
Nakamurella	0.278753	0.12647	0.00496771	0.00355114	0.00271106	0.00533485	0	0.00349314	0.00507911	0.0667573	0.116224	0.0394986	0.00286747	0.00150308	0.01848
Polyangium	0.242551	0.261372	0	0	0.0108442	0.00889142	0	0.00174657	0.0253955	0.00988997	0.119204	0.144828	0.00573493	0.00450924	0.2772
Edaphobacter	0.00724034	0.0927448	0.195397	0.276989	0	0	0.0566027	0	0	0.00494499	0	0	0	0.00150308	0
Nephroselmis	0.275133	0	0	0	0	0	0	0	0	0	0	0	0	0	0
Brevundimonas	0.0108605	0.00421567	0	0	0.0704874	0.0960273	0.00377351	0.0227054	0.126978	0.00741748	0.271188	0.00789973	0.24947	0.0165339	0.0231
Meniscus	0.00362017	0.00843135	0.0016559	0	0.271106	0.241847	0.0113205	0.00349314	0.00253955	0.0271974	0.00894028	0	0	0.00751541	0.00462
Candidatus Xiphinematobacter	0.112225	0.118039	0.0016559	0	0.262972	0.243625	0.00754703	0.00349314	0.0355537	0.0346149	0.0923829	0.010533	0.00286747	0.00601233	0.0646801
Acetivibrio	0.0325815	0.0337254	0	0	0.20604	0.261408	0.222637	0.129246	0.0380933	0.140932	0.032781	0.00263324	0.0143373	0.036074	0.0785401
Actinokineospora	0	0	0.0016559	0.00355114	0.25755	0.241847	0	0	0.0101582	0.00494499	0.00596019	0	0	0	0.00462
Candidatus Nitrotoga	0.170148	0.257156	0.00496771	0.0106534	0	0	0.00754703	0.00873286	0	0.00247249	0.0238407	0.00263324	0.00286747	0.00601233	0.04158
Rubrivivax	0.22083	0.0885292	0.0016559	0.00355114	0.00271106	0.00889142	0.0377351	0.00873286	0.0914239	0.0271974	0.229467	0.139562	0.255204	0.00751541	0.12474
Saccharicrinis	0.00362017	0.00421567	0	0.00355114	0.254839	0.195611	0.216977	0.024452	0.00253955	0	0	0	0.086024	0.157824	0.01848
Zobellella	0	0.00421567	0.0016559	0	0.00271106	0.00177828	0.00188676	0.00174657	0.253955	0.00494499	0	0.00263324	0.00573493	0	0
Candidatus Kuenenia	0.253412	0.101176	0.0016559	0.00710227	0.0108442	0.00177828	0.167921	0.00174657	0.121899	0.00247249	0.157945	0.0500316	0.0258072	0.00450924	0.14784
Coffea	0.00362017	0.25294	0.0662361	0.0284091	0.00271106	0	0	0	0.00507911	0	0	0	0	0.0420863	0.00462
Thiobaca	0	0.00843135	0	0	0.00271106	0	0	0	0	0	0	0	0.00286747	0.252518	0
Ruminococcus	0.0108605	0.00843135	0	0	0.0108442	0.0266743	0.250939	0.00174657	0	0.00988997	0.00298009	0.00263324	0.0086024	0.0210431	0.01386
Azospira	0.0108605	0	0.0579566	0.181108	0	0.00355657	0	0	0.00507911	0.249722	0.0268208	0	0.0229397	0.00450924	0.02772
Fragilaria	0.0506824	0.118039	0	0.00355114	0	0	0.00188676	0.0139726	0.248876	0.00247249	0.0417213	0.00263324	0	0.00300616	0.0554401
Phenylobacterium	0.021721	0.0295097	0.192085	0.24858	0.0677764	0.037344	0.0226411	0.00349314	0.00761866	0.00247249	0.0536417	0.0263324	0.00573493	0.00450924	0
Chlorogloea	0.00362017	0.00843135	0	0	0.00542211	0.0106697	0.247165	0	0	0	0	0.00789973	0	0.00150308	0
Thermanaerothrix	0.0941245	0.0800978	0	0.0177557	0.184352	0.245403	0.0245278	0.0192123	0.0787262	0.0618123	0.0804625	0.0315989	0	0.00601233	0.0693001
Nesterenkonia	0.0325815	0	0.0132472	0.241477	0	0	0.00188676	0	0	0	0	0	0	0	0
Hydrogenothermus	0	0.00421567	0	0	0.00542211	0	0	0	0	0	0	0	0	0.23899	0
Hyphomonas	0.0362017	0.0295097	0.00331181	0.00355114	0.0379548	0.0355657	0.0169808	0.0209589	0.147294	0.014835	0.238407	0.0579313	0.0143373	0.00300616	0.15246
Chitinimonas	0	0.00843135	0	0	0	0.00355657	0	0.00174657	0.147294	0.0370874	0.238407	0.0131662	0.0286747	0	0.02772
Blastopirellula	0.22083	0.15598	0.0712038	0.0568182	0.214173	0.23829	0.181129	0.0139726	0.210783	0.0173075	0.0923829	0.0184327	0.0143373	0.00601233	0.0831601
Methyloglobulus	0.00362017	0.012647	0	0.00355114	0.187063	0.23829	0.00188676	0	0	0.00247249	0	0	0	0.00150308	0.00462
Methanosphaera	0	0	0.0016559	0	0.0135553	0.00711313	0.235845	0	0	0	0	0	0	0.00150308	0
Flavihumibacter	0.00724034	0.0674508	0	0	0.0135553	0.012448	0.00377351	0.06113	0.0279351	0.00741748	0.235427	0.0447651	0.0086024	0.00300616	0.00462
Ralstonia	0.235311	0.18549	0.0132472	0.024858	0.173508	0.190276	0.0320749	0.012226	0.0507911	0.00988997	0.125164	0.0236992	0.0143373	0.0195401	0.01386
Rhodocista	0.235311	0.101176	0.00331181	0.0887784	0.00271106	0	0.0471689	0	0.0203164	0.00741748	0.0178806	0.0210659	0.0086024	0.00300616	0.00924001
Syntrophorhabdus	0.235311	0.0927448	0.0331181	0.00710227	0.121998	0.172494	0	0.00174657	0	0.00494499	0.00596019	0.00526648	0.00286747	0.00601233	0.00924001
Aquiflexum	0	0	0	0	0.00813317	0	0	0.00349314	0.231099	0	0	0.0157995	0	0	0.03696
Methanothermococcus	0.00724034	0.00843135	0	0	0.00271106	0	0.230184	0	0	0	0	0	0	0	0
Undibacterium	0.00362017	0.00421567	0.00496771	0.0142045	0	0	0.0113205	0.00174657	0.00253955	0.00988997	0.172845	0.229092	0.111831	0.00150308	0.0462
Desulfobulbus	0.0615429	0.118039	0	0.00710227	0.0731985	0.0924707	0.228298	0.0104794	0.0253955	0.0519224	0.0208607	0	0.0372771	0.00450924	0.0646801
Blastochloris	0.228071	0.164411	0.0364299	0.0390625	0.00542211	0	0.0999981	0.00174657	0.00761866	0.00741748	0.0238407	0.010533	0	0	0
Paucibacter	0.0687833	0.0379411	0.0016559	0	0.00542211	0.00533485	0.00943378	0.036678	0.101582	0.00741748	0.226487	0.110596	0.0774216	0.00450924	0.12012
Nocardioides	0.159288	0.206568	0.0016559	0	0.0569322	0.0604616	0	0.0104794	0.0685679	0.0222524	0.184766	0.226459	0.0372771	0.00901849	0.0693001
Phormidium	0.0108605	0.00421567	0	0.00710227	0.048799	0.0320091	0.00377351	0.223561	0.0177769	0	0.0834426	0.00263324	0.0086024	0.00300616	0.1155
Rubrobacter	0.22083	0.160196	0.0695479	0.0284091	0.0189774	0.012448	0.00943378	0.0157192	0.0888844	0.00494499	0.00894028	0.0184327	0	0.00300616	0
Crocinitomix	0.22083	0.164411	0.0016559	0	0.00813317	0.0106697	0.0377351	0.0157192	0.205704	0.00247249	0.0834426	0.129029	0.00573493	0.00901849	0.12012
Telmatospirillum	0.00362017	0.00421567	0.104322	0.22017	0.00271106	0	0	0	0.00253955	0.00494499	0	0	0	0	0
Candidatus Cardinium	0	0	0	0	0	0	0.00188676	0	0.0152373	0	0.00298009	0.00789973	0.217927	0	0.00462
Candidatus Odyssella	0	0.00843135	0.0695479	0.216619	0.0108442	0.00533485	0.0490557	0.00174657	0.0101582	0.00988997	0.0119204	0.0184327	0.0229397	0.00601233	0.0462
Ensifer	0.0651631	0.0337254	0.0016559	0	0.0189774	0.037344	0.113205	0.00523972	0.0126978	0.212634	0.0536417	0.00789973	0	0.00150308	0.03234
Sporosarcina	0	0	0.0016559	0	0	0	0.20943	0	0.00507911	0.00247249	0	0	0	0	0
Paludibacterium	0	0	0.208644	0.0177557	0	0	0	0.00698629	0	0.0173075	0	0	0	0.00150308	0
Legionella	0.0506824	0.00421567	0.0115913	0	0.138264	0.144041	0.188676	0.00349314	0.00761866	0.0123625	0.0149005	0.0131662	0.00286747	0.204419	0.00462
Cystobacter	0.130326	0.105392	0.203676	0.174006	0.0135553	0.0231177	0.0113205	0	0.00761866	0.00494499	0.119204	0.0184327	0	0.0105216	0.00924001
Marinifilum	0	0	0	0	0.0108442	0.00533485	0.0320749	0.0227054	0.00253955	0.00741748	0	0	0.20359	0.0420863	0
Pseudonocardia	0.0108605	0.0716665	0.0016559	0	0.203329	0.193833	0.00188676	0.00174657	0.00761866	0.0123625	0.0596019	0.00526648	0	0	0.00462
Leadbetterella	0.0108605	0.00843135	0.0016559	0.00355114	0.00271106	0	0	0.00174657	0.0558702	0	0.134104	0.200126	0.00573493	0.00150308	0.19866
Dongia	0.166528	0.0969605	0.0248385	0.0568182	0.00542211	0.00177828	0.199996	0.00174657	0.0152373	0.0173075	0.032781	0.00526648	0	0.00300616	0.00924001
Denitratisoma	0.0506824	0.0590194	0.00331181	0.00355114	0.00542211	0.00177828	0.13396	0	0.180308	0.00988997	0.199666	0.0421319	0.00286747	0.00300616	0.0831601
Georgfuchsia	0.00362017	0.00421567	0.0016559	0	0.00813317	0	0.196223	0.00349314	0.00507911	0.0370874	0.0178806	0.00526648	0.00573493	0	0.0462
Parasegetibacter	0.0181009	0.151764	0	0.00355114	0.00813317	0.0106697	0.00188676	0.0192123	0.195546	0.00247249	0.0804625	0.0842637	0.0086024	0.00150308	0.0646801
Ethanoligenens	0	0	0	0	0.0162663	0.0231177	0.00188676	0	0	0.195327	0.00298009	0	0	0	0.00462
Roseomonas	0.0181009	0.0210784	0.0629243	0.0674716	0.0243995	0.0302308	0	0.0279452	0.193006	0.0667573	0.0715222	0.0710975	0.00286747	0.00601233	0.0877801
Desulfatibacillum	0	0.00843135	0	0	0	0	0.192449	0	0.0126978	0	0	0.010533	0	0	0.02772
Navicula	0.00362017	0	0.00496771	0	0.00271106	0	0	0.00174657	0.00507911	0	0.0149005	0.192227	0.00286747	0.00300616	0.02772
Kofleria	0.191869	0.0716665	0.0298063	0.0319602	0.0325327	0.0320091	0.0169808	0.00698629	0.00253955	0.00247249	0.00298009	0.010533	0.00286747	0.00300616	0
Peredibacter	0.00362017	0	0.0016559	0	0	0.00177828	0.00377351	0	0.00253955	0.00247249	0.187746	0.0816305	0.0229397	0	0.01386
Methylogaea	0.00362017	0	0	0	0.151819	0.184941	0	0	0	0	0.00298009	0	0.00286747	0.00300616	0
Candidatus Cloacimonas	0	0	0	0	0.00271106	0	0.183015	0	0.00253955	0.00988997	0.00298009	0	0	0	0
Moorella	0.0470622	0.181274	0	0.00355114	0.0786206	0.0924707	0.0754703	0.024452	0.00507911	0.00247249	0	0	0	0.00751541	0.00924001
Mariniphaga	0	0	0	0	0.0108442	0.00711313	0.0339616	0.179897	0	0	0.00298009	0	0	0.00751541	0.00462
Ferrithrix	0.173768	0.0927448	0.0264945	0.0177557	0.0352437	0.0195611	0	0.00523972	0.0660284	0.014835	0.178806	0.0421319	0.00286747	0.00751541	0.03696
Acidibacter	0.00362017	0.00421567	0.107634	0.177557	0	0.00177828	0.00377351	0	0.00253955	0	0.00298009	0	0	0	0
Candidatus Microthrix	0.123086	0.118039	0	0	0.0108442	0.00177828	0.00188676	0	0.0279351	0.00494499	0.119204	0.173794	0.00573493	0.00901849	0.0462
Prosthecomicrobium	0.173768	0.101176	0.0016559	0.00355114	0.0135553	0.00711313	0.0603762	0.00174657	0	0.00988997	0.00298009	0.00263324	0	0.00300616	0.00924001
Pelagibius	0.123086	0.172843	0	0	0	0	0	0.00174657	0.0101582	0	0	0.00263324	0	0.00300616	0.00462
Herpetosiphon	0	0	0	0	0.00271106	0.00177828	0	0	0.17269	0.00494499	0.00894028	0.0210659	0	0	0.01386
Methylocaldum	0	0	0	0	0.124709	0.172494	0.00566027	0	0.00761866	0	0	0	0	0	0
Asterionellopsis	0	0.00421567	0	0.00355114	0	0.00177828	0	0	0	0.00247249	0.00298009	0	0	0.036074	0.17094
Lacibacterium	0.0506824	0.0337254	0.0430535	0.170455	0	0	0.0226411	0.00174657	0.0101582	0.0445049	0.0178806	0.0131662	0	0.0165339	0
Methermicoccus	0	0.00421567	0	0	0	0.00177828	0.00943378	0	0.17015	0	0.00298009	0	0	0.00150308	0
Candidatus Thiopilula	0.00362017	0	0.0016559	0	0.00271106	0.00177828	0.169808	0.00523972	0.00253955	0	0	0	0	0.037577	0.00462
Gluconacetobacter	0.00362017	0.00421567	0.0480212	0.166903	0	0	0.00188676	0	0	0.00494499	0.00894028	0	0	0	0
Desulfotignum	0	0	0	0	0	0	0.166035	0.00349314	0	0	0	0	0	0.00150308	0
Bosea	0.0108605	0.025294	0.00331181	0	0.165374	0.142263	0.00754703	0.00873286	0.0482515	0.0222524	0.101323	0.010533	0.00286747	0.0120247	0.0693001
Haslea	0.162908	0.164411	0	0	0.00271106	0	0	0.00523972	0.0177769	0	0.00596019	0.00526648	0	0.036074	0.00462
Chlorobium	0.00362017	0.0210784	0	0	0.0216884	0.0284525	0.164148	0.012226	0.00253955	0	0	0	0.00286747	0.0496017	0.01386
Ktedonobacter	0	0.012647	0	0	0.0379548	0.0337874	0.00188676	0	0.00253955	0.163185	0.0268208	0	0	0.00601233	0
Candidatus Alysiosphaera	0.162908	0.113823	0.0016559	0.00355114	0.048799	0.0764662	0.00377351	0.00349314	0.0609493	0.0469774	0.0804625	0.0131662	0.00286747	0	0.0785401
Thermoanaerobaculum	0	0	0	0	0.162663	0.151154	0.109432	0.00523972	0.0203164	0.00494499	0.00596019	0	0.00286747	0	0
Sphaerobacter	0.104985	0.160196	0.0016559	0.00355114	0.0759096	0.081801	0.00188676	0.00873286	0.0787262	0.00988997	0.0298009	0.0342321	0.0086024	0.00150308	0.01848
Simplicispira	0	0	0	0	0	0	0	0	0.159992	0	0.00596019	0.010533	0.0258072	0	0.00462
Rhodopirellula	0.141187	0.0800978	0.158967	0.0319602	0.00813317	0.00711313	0.0867908	0.00174657	0.0990426	0.00247249	0.0268208	0.010533	0.00286747	0.00150308	0.03234
Thiofaba	0	0	0	0.00355114	0	0.00355657	0.0679232	0.158938	0	0.00494499	0	0.00263324	0	0.0165339	0
Herbaspirillum	0.00362017	0.012647	0.00496771	0.00710227	0.0108442	0	0.0132073	0.00873286	0.0152373	0.0247249	0.157945	0.0631978	0.0200723	0	0.0600601
Roseibacillus	0.00362017	0.012647	0	0	0.0135553	0.0195611	0.00943378	0.012226	0.109201	0.00247249	0.149005	0.0789973	0.0602168	0.00601233	0.15708
Methanobrevibacter	0.00724034	0	0	0.00710227	0.00542211	0.00533485	0.156601	0.00349314	0	0	0	0	0	0	0
Thermoleophilum	0.119466	0.15598	0.0016559	0	0.00542211	0.00177828	0	0	0.00507911	0	0.0149005	0.00526648	0	0.00150308	0.00462
Cyanothece	0.00362017	0.00421567	0.0761716	0.0568182	0	0	0.0377351	0	0.00507911	0.155767	0.00596019	0	0	0	0
Rhodopila	0	0	0.155655	0.0674716	0	0	0	0.00174657	0	0.0469774	0	0.00263324	0	0	0
Sandarakinorhabdus	0	0	0	0	0.00813317	0	0.00188676	0.00873286	0.0431724	0.00494499	0.154965	0.0236992	0.0172048	0.0420863	0.03234
Tolumonas	0	0.00843135	0	0	0	0.00355657	0.0226411	0.00174657	0.00761866	0.0123625	0.137084	0.0421319	0.154843	0.00150308	0.02772
Dokdonella	0.0506824	0.0548038	0.0016559	0	0.00813317	0.00355657	0.154714	0.00349314	0.0126978	0.00247249	0.0149005	0.0421319	0.00573493	0	0.03234
Thioploca	0.00362017	0	0	0	0	0.00177828	0.152827	0	0	0	0	0	0	0.00150308	0.00462
Mucilaginibacter	0	0.00421567	0.0695479	0.152699	0.0189774	0.0177828	0.00566027	0.00349314	0.00507911	0.0197799	0.0149005	0.00263324	0.00286747	0	0.00462
Phytophthora	0	0	0	0	0	0.00177828	0	0.0104794	0.00253955	0	0	0.0394986	0.0086024	0	0.15246
Variovorax	0.0470622	0.0505881	0.00331181	0.00355114	0.0108442	0.012448	0	0.00349314	0.0101582	0.00494499	0.151985	0.0342321	0.0401445	0.120247	0.0231
Algorimarina	0.0724034	0.0674508	0.150687	0.0923295	0.00542211	0.0142263	0.0188676	0.00174657	0.0152373	0.0321424	0.0119204	0.00263324	0.0344096	0	0.00462
Desulfomicrobium	0.00362017	0.0210784	0	0	0.0162663	0.00889142	0.0207543	0.0174657	0.0253955	0.00247249	0	0	0.149108	0	0.0600601
Sulfurisoma	0	0.00421567	0	0	0	0	0.101885	0	0.0152373	0.00988997	0.149005	0.0473984	0.0086024	0	0.01848
Saccharofermentans	0.00362017	0.00421567	0.00331181	0	0.00271106	0.00177828	0.0132073	0.148459	0.00253955	0	0.00298009	0	0	0.147302	0
Desulfitobacterium	0.148427	0.0885292	0	0	0.00271106	0.00355657	0.00188676	0.00174657	0.0203164	0.00247249	0.0119204	0.00526648	0	0.00150308	0
Schlegelella	0.148427	0.025294	0	0	0.00542211	0	0.0169808	0.00523972	0.124438	0	0.0685421	0.0157995	0	0.0135277	0.00924001
Paenibacillus	0.0325815	0.0295097	0.0016559	0.0177557	0.00542211	0.024896	0.00188676	0.00174657	0.0101582	0.14835	0.0119204	0.00263324	0.00573493	0.00150308	0
Catenuloplanes	0.0108605	0.147549	0	0.00355114	0	0	0	0	0.00253955	0.00247249	0.00298009	0	0	0.00150308	0
Schlesneria	0.0181009	0.0168627	0.034774	0.0426136	0.00271106	0.00533485	0.147167	0	0.00253955	0.0247249	0.0268208	0.0157995	0.00286747	0.00300616	0
Campylobacter	0.00724034	0.00843135	0.0016559	0	0.146397	0.117367	0.00566027	0	0	0	0.00298009	0	0	0.00450924	0
Kaistobacter	0	0.012647	0	0	0.0325327	0.0462354	0.00377351	0.00349314	0.00761866	0	0.146025	0.010533	0.0659517	0.00150308	0.00462
Thermodesulfovibrio	0.144807	0.12647	0.00331181	0	0	0	0.111319	0	0.0253955	0	0.00894028	0.00263324	0	0.00150308	0.00462
Nocardia	0	0.00421567	0.0016559	0	0.0813317	0.142263	0	0.00174657	0	0	0.00298009	0	0	0	0.00462
Bacteriovorax	0.0434421	0.0295097	0.00331181	0.00355114	0.0433769	0.0711313	0.00754703	0.00349314	0.0660284	0.00494499	0.0238407	0.142195	0.108964	0.00300616	0.0508201
Quatrionicoccus	0	0.00421567	0.0016559	0	0	0	0	0	0	0.0247249	0.00298009	0	0.140506	0.00150308	0.01848
Pelosinus	0.0325815	0.0210784	0.102666	0.0106534	0.0433769	0.0284525	0.0283014	0.139726	0.00761866	0.116207	0.0119204	0.00263324	0.0200723	0.00150308	0.03234
Melioribacter	0.0253412	0.0168627	0.0778275	0.0426136	0.00271106	0.00533485	0.13962	0.0104794	0.0126978	0.00247249	0.0745023	0.010533	0.00286747	0.00300616	0.02772
Phyllobacterium	0.00724034	0.00421567	0	0	0.00271106	0.00355657	0.13962	0	0.0152373	0	0.00894028	0	0	0	0.00462
Sulfuricella	0.0144807	0.139117	0	0	0	0.00177828	0.00754703	0.0384246	0.00507911	0.00988997	0.032781	0.00263324	0	0.00300616	0.0877801
Methanoregula	0.00362017	0.0463724	0.0016559	0.0142045	0.138264	0.0978056	0.00566027	0.00174657	0	0.00247249	0.00596019	0	0	0.00150308	0
Methanomassiliicoccus	0.00362017	0.00843135	0.00662361	0.00355114	0.121998	0.136928	0.0792438	0	0	0	0	0	0	0	0
Rhizobacter	0.0868841	0.0337254	0	0	0	0.00177828	0.00566027	0.00349314	0.0279351	0.00247249	0.134104	0.0236992	0.0114699	0.00300616	0.0462
Chitinibacter	0	0	0	0.00355114	0	0.00177828	0	0.00174657	0.0888844	0.00247249	0.134104	0.00526648	0.0487469	0	0
Picrophilus	0	0	0	0	0	0	0.13396	0	0	0	0.00298009	0	0	0	0
Massilia	0.133946	0.0632351	0	0	0.00271106	0.00355657	0	0.00174657	0.0558702	0.00741748	0.0745023	0.010533	0.0229397	0.00601233	0.01386
Pleurocapsa	0.00362017	0	0.0016559	0	0	0	0	0	0.00507911	0	0.0238407	0.131662	0.0086024	0.00751541	0.00924001
Duganella	0.021721	0.00421567	0	0	0.00271106	0	0	0.00174657	0	0	0.131124	0.00526648	0.00573493	0	0.00924001
Ruminiclostridium	0.0253412	0.012647	0	0.00355114	0.0189774	0.024896	0.130186	0	0.00507911	0.0222524	0	0	0	0	0
Halobacterium	0.0181009	0.025294	0	0	0	0.00355657	0.130186	0	0.00253955	0	0	0	0	0.00300616	0
Synechococcus	0.0181009	0.00421567	0.00331181	0.00355114	0.130131	0.0746879	0.06981	0.00698629	0.00253955	0.00741748	0.0476815	0.0210659	0.00286747	0.00901849	0.00924001
Ardenticatena	0.00724034	0.00421567	0.0016559	0	0.130131	0.12448	0.00943378	0.00698629	0.00253955	0.00741748	0	0	0	0.0345709	0
Psychrobacillus	0	0	0	0	0	0	0	0.00174657	0.129517	0.00988997	0.0119204	0	0	0	0
Proteocatella	0	0	0	0.00355114	0.00271106	0	0.0245278	0.129246	0.0152373	0.101372	0	0	0.0200723	0.00601233	0.00462
Ramlibacter	0.00362017	0.00421567	0	0	0.00271106	0.00177828	0.00188676	0.00174657	0.00761866	0.00247249	0.128144	0.0236992	0.0229397	0	0.00924001
Defluviicoccus	0.0144807	0	0.0016559	0	0.0894648	0.128036	0.00188676	0.00349314	0.0101582	0.00494499	0.032781	0	0	0	0.00924001
Candidatus Nitrosoarchaeum	0.0796438	0.0758821	0.0016559	0.127841	0	0.00177828	0.0452822	0	0.00253955	0	0.0119204	0.00789973	0.00573493	0	0
Sandaracinus	0.126706	0.0505881	0	0.00355114	0.0298216	0.0320091	0.0377351	0.00174657	0.0380933	0.0445049	0.0596019	0.0421319	0.00286747	0.00450924	0.01848
Eggerthella	0.126706	0.0548038	0	0	0	0.00355657	0	0.00174657	0.00253955	0.00741748	0.00894028	0.00263324	0.00286747	0.00150308	0
Catenulispora	0.126706	0.0800978	0	0	0	0	0	0.00174657	0.0152373	0.00247249	0	0.00263324	0	0.00300616	0
Halochromatium	0.0144807	0.00843135	0	0	0.00813317	0.00889142	0.0169808	0.0436643	0.124438	0.00247249	0.00894028	0.00263324	0.00286747	0.00901849	0.0231
Thermosporothrix	0.00724034	0.00421567	0.0016559	0	0.116575	0.122702	0.00188676	0.00174657	0	0	0.00596019	0.0157995	0	0.00150308	0
Peptoclostridium	0	0	0	0.00355114	0.00271106	0.00355657	0.122639	0.0157192	0	0	0	0	0	0.00901849	0
Methanobacterium	0.0362017	0.0295097	0.0016559	0	0.121998	0.11381	0.0150941	0.00174657	0	0.00494499	0.00298009	0	0	0	0
Owenweeksia	0.0325815	0.0210784	0	0.00355114	0.0406658	0.0320091	0.111319	0.00698629	0.121899	0	0.110263	0.0921635	0.00286747	0.0616263	0.0462
Frateuria	0	0	0	0	0	0.00177828	0.00188676	0.0104794	0	0.00494499	0.00298009	0	0	0.120247	0
Thioalkalivibrio	0.119466	0.0674508	0	0.0106534	0.00813317	0.0106697	0.0264146	0.0104794	0.116819	0	0.0387412	0.0500316	0	0	0.10164
Gordonibacter	0.115845	0.101176	0	0	0.0189774	0.0231177	0.0339616	0.00174657	0.00761866	0.00988997	0.0119204	0.00263324	0.00286747	0.00150308	0
Chroococcidiopsis	0	0	0	0	0.00813317	0.00711313	0.115092	0	0.00253955	0	0	0.010533	0	0.00751541	0
Deefgea	0	0	0	0.00355114	0	0.00533485	0.00188676	0	0.0558702	0	0.0357611	0.0157995	0.114699	0	0.03234
Luedemannella	0.0434421	0.113823	0	0	0.0243995	0.024896	0	0.00349314	0.00253955	0.00741748	0.0178806	0	0	0	0
Citreicella	0	0	0.0016559	0	0	0	0	0.00523972	0.0812657	0.00494499	0.0983431	0.100063	0.00573493	0	0.11088
Hypnea	0	0	0	0	0	0.00355657	0	0.00349314	0	0.00247249	0.00298009	0.0552981	0.00286747	0	0.11088
Rubritalea	0	0.00421567	0	0	0	0	0	0	0.0152373	0	0	0.00263324	0	0	0.11088
Verrucosispora	0.0108605	0.109608	0	0	0.0216884	0	0	0	0.00253955	0	0	0	0	0	0
Aquamicrobium	0.0144807	0	0	0	0.00271106	0.00533485	0	0.00349314	0.109201	0	0.0149005	0.010533	0	0	0.01386
Pseudoxanthomonas	0.00362017	0.0168627	0	0	0	0.00177828	0	0.00698629	0.109201	0.00494499	0.032781	0.0263324	0	0.00150308	0.0554401
Emticicia	0.00724034	0	0	0	0	0	0	0.00698629	0.00253955	0	0.065562	0.107963	0.0200723	0.037577	0.01848
Janthinobacterium	0.0253412	0.0337254	0.107634	0.0461648	0.00542211	0.00889142	0.0679232	0.0314383	0.00507911	0.0247249	0.0208607	0.0552981	0.043012	0.0255524	0
Micavibrio	0.0144807	0.00843135	0.00331181	0.0177557	0.0162663	0.024896	0.107545	0.00349314	0.0304746	0.00988997	0.0357611	0.00789973	0.00286747	0	0.01386
Tetrasphaera	0.0687833	0.0379411	0	0.00355114	0.0135553	0.0142263	0	0.00523972	0.106661	0.00494499	0.0536417	0.0473984	0.0086024	0	0.0554401
Litorilinea	0	0	0	0.00355114	0.105731	0.104919	0.00377351	0	0	0.00247249	0	0	0	0.00150308	0.00462
Thiohalophilus	0.104985	0.0421567	0	0	0	0.0142263	0	0	0.0330142	0	0.00894028	0	0	0	0
Dyella	0.00362017	0	0	0.00355114	0	0	0.00754703	0.00349314	0.104122	0	0.0417213	0.0236992	0	0.00300616	0.0693001
Methanosphaerula	0	0	0	0	0	0	0.103772	0	0	0	0	0	0	0	0
Sphingobium	0.0108605	0.012647	0	0	0.00271106	0.0106697	0.00377351	0.00174657	0.022856	0.0890098	0.0506616	0	0.103229	0	0.01848
Maricaulis	0.0108605	0	0	0	0.00542211	0.00177828	0.0264146	0.103048	0.00253955	0	0	0	0	0.00150308	0
Kitasatospora	0.0181009	0.0168627	0	0	0.00271106	0	0.0735835	0	0.0406329	0.00247249	0.065562	0.0658311	0.0086024	0.00150308	0.10164
Lachnoclostridium	0.0108605	0.00843135	0	0	0.0731985	0.0853576	0	0.0419177	0.022856	0.101372	0.00894028	0	0.0229397	0.0195401	0.0231
Labilithrix	0.00362017	0	0.0016559	0	0	0	0	0	0	0.101372	0	0	0	0	0.00462
Thiorhodovibrio	0.0977446	0.101176	0.0016559	0	0	0.00355657	0	0	0.0711075	0.00247249	0.0387412	0.0289657	0.00286747	0.00450924	0.02772
Geoalkalibacter	0.0362017	0.101176	0.0182149	0.0958807	0.0162663	0.012448	0.00377351	0	0.00507911	0	0.00894028	0.0236992	0.00286747	0.00751541	0
Blastococcus	0.0181009	0.101176	0.0016559	0	0.0298216	0.037344	0.00188676	0	0.0126978	0	0.00298009	0.00263324	0.00286747	0.00450924	0
Thiophaeococcus	0	0	0	0	0	0	0.00188676	0.0995546	0	0	0	0.00263324	0	0.0330678	0
Thiohalomonas	0	0	0.0016559	0	0	0.00533485	0	0.00174657	0.0990426	0	0	0.00263324	0	0	0.00462
Trichococcus	0	0.0168627	0	0	0.00271106	0	0	0.0978081	0	0.0271974	0	0	0.0172048	0	0
Croceimarina	0	0.00421567	0	0.00355114	0.00542211	0	0	0.00174657	0	0	0	0	0.00286747	0.0977003	0.01386
Acidithiobacillus	0.0362017	0.0969605	0	0	0	0.00177828	0	0.00174657	0.045712	0	0.0417213	0.00526648	0.00286747	0.00300616	0.00462
Acetanaerobacterium	0.00362017	0	0	0	0	0	0.0962246	0	0	0	0	0	0	0	0
Nitrospirillum	0.0108605	0	0.0115913	0.0958807	0.00271106	0	0	0.00174657	0.00253955	0	0	0	0	0	0
Chloroidium	0.0144807	0	0.00331181	0	0.00542211	0	0	0.00174657	0.00253955	0	0	0	0.00286747	0.0946941	0
Heliobacterium	0.0796438	0.0927448	0	0.00355114	0	0	0.00754703	0	0.00761866	0	0.00298009	0	0	0.00150308	0
Thermovum	0.0615429	0.0927448	0	0	0.00813317	0.0106697	0	0	0	0	0.00298009	0.00263324	0.00286747	0.00150308	0
Rugosimonospora	0.0579227	0.0927448	0	0	0.0135553	0.00711313	0	0.00174657	0.00253955	0	0.00298009	0.00263324	0	0.00601233	0.00462
Bacillus	0.00724034	0.0927448	0	0	0.00813317	0.00711313	0.00188676	0.0139726	0.0304746	0.00247249	0.00894028	0.010533	0.0086024	0.0120247	0.00462
Jahnella	0.0108605	0.0295097	0	0	0	0.00177828	0.00377351	0	0.0279351	0	0.0298009	0.0289657	0	0	0.0924001
Desulfotomaculum	0.0253412	0.0463724	0.00496771	0.00355114	0.0921759	0.0871359	0.00754703	0	0	0	0.0119204	0	0	0.00150308	0.00462
Azoarcus	0.0579227	0.0168627	0	0	0	0	0	0	0.0914239	0	0.0178806	0.00263324	0	0	0.01386
Roseicyclus	0	0	0.0016559	0	0	0.00177828	0	0.00523972	0.0914239	0	0	0	0	0	0.00462
Sporobacter	0.0181009	0.00421567	0	0	0.00813317	0.00889142	0.0905643	0	0.00507911	0.00494499	0.00298009	0	0.00573493	0	0
Oxalophagus	0.0905043	0.0505881	0	0	0.0108442	0	0.0283014	0.00349314	0.0152373	0	0.00298009	0.010533	0.00573493	0.00300616	0.03234
Dactylosporangium	0.0905043	0.0800978	0	0	0	0	0	0	0	0	0.00298009	0.00263324	0	0.00150308	0
Deinococcus	0.00362017	0	0	0	0	0	0	0.00174657	0.0126978	0.0445049	0.00894028	0.0895302	0.0602168	0.00150308	0.00462
Hydrocarboniphaga	0	0	0	0	0.00542211	0.024896	0	0	0	0.0890098	0	0.00263324	0	0	0
Limnobacter	0	0.012647	0.0016559	0	0	0	0	0.00174657	0.0888844	0.0173075	0.0119204	0	0	0.00150308	0.00462
Actinocorallia	0	0.0379411	0.0016559	0.0852273	0.00542211	0	0.0886776	0	0	0.00988997	0	0.0157995	0	0.00300616	0
Dysgonomonas	0	0	0	0	0	0	0.00188676	0.0873286	0	0.0494499	0	0	0	0	0
Sporomusa	0.0796438	0.0548038	0.0016559	0	0.0840427	0.0871359	0	0.00174657	0.00253955	0	0.00894028	0.00263324	0	0.00300616	0
Thauera	0.0108605	0	0	0	0.00271106	0.00355657	0.0867908	0.00174657	0.0304746	0.00494499	0.0268208	0.00526648	0.00286747	0.0105216	0.00462
Magnetococcus	0.00362017	0	0	0	0	0	0.0867908	0	0.00507911	0.00247249	0.0685421	0.0289657	0	0	0.00462
Croceibacter	0	0.00421567	0	0	0.0867538	0.0569051	0.00377351	0.0349314	0.022856	0	0.0208607	0.00789973	0	0.00150308	0.0508201
Nannochloropsis	0.0181009	0	0.0016559	0.00355114	0	0	0	0.0331849	0.0863448	0	0.00298009	0.00263324	0	0	0
Candidatus Desulforudis	0.00362017	0	0	0	0.0135553	0.0213394	0.0226411	0.085582	0	0	0	0.00263324	0	0.0105216	0
Porphyromonas	0	0.00421567	0	0	0	0	0	0.085582	0	0.00741748	0	0	0	0.0165339	0
Herminiimonas	0	0	0.0844511	0.0852273	0	0	0	0	0	0.00247249	0	0	0	0.00150308	0
Isosphaera	0.0108605	0.0295097	0.0844511	0.0603693	0	0.00355657	0.00188676	0	0.00253955	0.00494499	0.00596019	0	0	0	0
Puniceicoccus	0.021721	0.0843135	0	0	0	0	0.00188676	0	0.00253955	0	0	0.00263324	0	0.00150308	0
Desulfocurvus	0	0.012647	0	0	0.0135553	0.0213394	0.00188676	0.00174657	0.00253955	0	0	0.0842637	0	0	0
Flectobacillus	0	0	0	0	0	0	0.00188676	0.00698629	0.00253955	0	0	0.0842637	0.0315421	0	0
Desulfococcus	0.00362017	0.00421567	0	0	0.0108442	0.0195611	0.0716968	0.0227054	0.0152373	0.0840648	0.0149005	0.0157995	0.0086024	0.00300616	0.00462
Gemmobacter	0	0	0	0	0.0135553	0.0177828	0.00188676	0.0192123	0.0838053	0.0173075	0.0536417	0.0263324	0.0114699	0.0195401	0.0739201
Alkalispirillum	0.0832639	0.0210784	0	0	0.00271106	0.00889142	0	0	0.0152373	0.00247249	0.0119204	0.00526648	0	0	0.00924001
Sunxiuqinia	0	0	0	0	0	0	0.0830173	0	0	0	0	0	0	0	0
Tahibacter	0	0	0	0	0	0	0.0811305	0	0.00253955	0	0	0	0	0	0
Roseiflexus	0.0651631	0.0800978	0	0	0.00813317	0.00711313	0.00188676	0	0	0.00741748	0.0238407	0.00526648	0	0.00450924	0
Micromonospora	0.0651631	0.0800978	0	0	0.0243995	0.0302308	0.00188676	0.00523972	0.00507911	0.00247249	0.0208607	0.00526648	0	0.00150308	0
Thermaerobacter	0.021721	0.0800978	0	0	0.0108442	0.0160046	0	0	0	0	0.00894028	0	0	0.00150308	0
Hippea	0.0181009	0.0800978	0	0	0	0	0.0452822	0.00174657	0	0.00247249	0	0	0	0.00300616	0
Gloeobacter	0.00724034	0	0.0132472	0.0106534	0.0650653	0.0800228	0.00566027	0	0	0.0370874	0.00298009	0.00526648	0	0.00300616	0
Nevskia	0.00362017	0.00843135	0.00331181	0	0.00813317	0	0.00377351	0.0209589	0.00253955	0.00247249	0.0119204	0.00526648	0.0200723	0.0796633	0.00462
Anabaena	0.0796438	0.012647	0.0132472	0.0319602	0	0	0	0	0.00253955	0.00247249	0	0.00263324	0.00573493	0	0
Acidicapsa	0	0	0.0794834	0.0319602	0	0	0	0	0	0	0	0	0	0	0
Marinithermus	0	0	0	0.00355114	0.0108442	0.0106697	0.0792438	0.00873286	0.0431724	0.00247249	0.00596019	0	0	0.0120247	0
Tabrizicola	0	0	0.0016559	0	0	0	0.0132073	0.00873286	0.0787262	0	0.0119204	0.0184327	0.0286747	0.00150308	0.0600601
Methylacidiphilum	0.00724034	0.00421567	0.0496771	0.0106534	0.0786206	0.0586834	0.0433954	0	0.00253955	0.0519224	0	0.00263324	0	0	0
Pelagomonas	0	0	0	0	0	0	0	0.0785958	0.00253955	0	0	0	0	0	0
Eubacterium	0.0181009	0.012647	0	0	0.0759096	0.0675748	0.0264146	0.00349314	0	0	0.00894028	0	0	0.00300616	0
Tyzzerella	0	0	0	0	0.0759096	0.0426788	0.00188676	0	0	0	0	0	0	0.018037	0
Brucella	0	0	0	0	0.00271106	0	0.00377351	0.00174657	0.00253955	0	0.0745023	0.0631978	0.00286747	0.00150308	0.01848
Coprothermobacter	0	0	0	0	0	0	0	0	0	0.0741748	0	0	0	0	0
Anaerobacterium	0.0108605	0.00421567	0	0.00355114	0	0.0106697	0.0735835	0.00174657	0	0.0642848	0	0	0	0	0
Cellulosilyticum	0	0	0	0	0	0.00177828	0.0735835	0.00174657	0	0	0	0	0	0	0.00462
Methanotorris	0	0	0	0	0	0	0.0735835	0	0	0	0	0	0	0	0
Ochrobactrum	0	0	0	0.00355114	0	0	0.0735835	0	0	0	0	0.00789973	0.00286747	0	0
Alkaliphilus	0	0.00421567	0	0	0.00542211	0	0.0377351	0.073356	0.00253955	0	0	0	0	0.00300616	0.01848
Flavitalea	0.0724034	0.0548038	0.0016559	0.00355114	0	0.00355657	0	0	0	0	0.0119204	0	0.00286747	0	0
Alterococcus	0.0724034	0.0379411	0.0016559	0.00355114	0.00542211	0.00711313	0	0	0.0253955	0	0.00298009	0	0	0	0
Chrysosphaera	0.0325815	0.0210784	0.0215267	0	0.00271106	0.00533485	0	0.00174657	0.0279351	0.0692298	0.00298009	0.0473984	0.0716866	0.00450924	0.0554401
Desulfosporosinus	0.0687833	0.0716665	0.0016559	0	0.0108442	0.0213394	0.00566027	0.00698629	0.00507911	0.0370874	0.00894028	0.00263324	0.00286747	0.00300616	0
Cryobacterium	0.0253412	0.0337254	0.0016559	0	0.0704874	0.0693531	0.00377351	0.00873286	0.0279351	0.0445049	0.0596019	0.0605646	0.00286747	0.00300616	0.0462
Aetherobacter	0.0181009	0.0421567	0.00662361	0.00355114	0	0	0.0433954	0	0.0406329	0.00988997	0.0119204	0.0473984	0.00286747	0	0.0693001
Alkalimonas	0	0.00421567	0	0.00355114	0	0	0.00188676	0	0.022856	0	0	0.0631978	0	0	0.0693001
Starkeya	0.0108605	0.00843135	0	0	0.00271106	0	0	0	0	0.0692298	0.00596019	0	0	0	0
Denitrovibrio	0	0	0.0016559	0	0	0	0	0	0	0.0692298	0	0	0	0	0
Natranaerovirga	0.0181009	0.012647	0	0.00355114	0.00542211	0.012448	0.0264146	0	0.0126978	0	0	0	0.00286747	0.0691417	0.00924001
Microvirga	0.0687833	0.0337254	0.00662361	0.0142045	0.0135553	0.0302308	0.0188676	0.00349314	0.00253955	0	0.00894028	0	0	0.00150308	0
Paracoccus	0.021721	0.0421567	0	0	0	0	0.0245278	0.00698629	0.0685679	0.0197799	0.0536417	0.0210659	0.00573493	0.00300616	0.03696
Luteimonas	0.00362017	0	0	0	0	0.00177828	0.00943378	0.012226	0.0685679	0	0.0268208	0.0184327	0.0172048	0	0.01386
Caldanaerobacter	0.0289614	0.0590194	0	0	0.0162663	0.0160046	0	0.00174657	0.0279351	0	0.0685421	0.0157995	0	0.00300616	0.00924001
Skeletonema	0	0	0	0	0	0	0	0	0	0	0	0.0684643	0	0.00150308	0
Actinotalea	0.00724034	0.012647	0	0	0.0677764	0.0497919	0	0.0174657	0.00253955	0.00494499	0.00298009	0.00263324	0	0.018037	0.00462
Thermincola	0.00362017	0	0	0.00355114	0.0677764	0.0480137	0.0113205	0.00873286	0	0	0	0.010533	0.00286747	0	0.00924001
Smithella	0.0108605	0.00421567	0	0	0.0433769	0.0675748	0.0169808	0	0	0.00247249	0.00298009	0	0	0.00150308	0.00462
Parvibaculum	0	0	0.0132472	0.0674716	0	0	0.0188676	0	0	0	0.00298009	0	0	0	0
Vallitalea	0.00362017	0	0	0.00710227	0.0379548	0.0213394	0	0.00698629	0.0660284	0.00247249	0	0.00526648	0.00573493	0.0240493	0.01386
Uliginosibacterium	0.00362017	0.00421567	0	0	0.00542211	0.00533485	0	0.00174657	0.0177769	0.0123625	0.00596019	0.0658311	0.0172048	0.00601233	0.01386
Azonexus	0	0	0	0	0	0	0	0	0.00253955	0	0.0238407	0.0658311	0.00286747	0	0.00924001
Methanomicrobium	0.0108605	0.00421567	0	0	0.0650653	0.0515702	0.0528292	0	0	0	0.00298009	0	0	0.00150308	0
Gelidibacter	0	0	0	0	0	0	0	0.0646232	0	0	0	0	0	0	0
Acidocella	0.0108605	0.00421567	0.0579566	0.0213068	0.00271106	0	0	0	0.0126978	0.0642848	0.0536417	0.0263324	0	0	0.00462
Acetohalobium	0	0	0	0	0	0	0.0641497	0	0	0	0	0	0	0	0
Bifidobacterium	0.021721	0.025294	0.00496771	0.0639205	0	0	0	0	0	0	0.00298009	0	0	0	0.00462
Allokutzneria	0	0.00421567	0	0	0	0	0	0	0.0634888	0	0	0	0	0	0
Anderseniella	0.021721	0.0632351	0	0	0	0	0	0	0	0	0.00298009	0.00789973	0	0	0
Plesiocystis	0.0253412	0.0379411	0	0.00355114	0.00271106	0.00533485	0.00566027	0	0.0304746	0	0.00596019	0.0631978	0	0.00150308	0.01848
Chryseolinea	0.0144807	0.00843135	0	0	0.00271106	0	0	0	0.045712	0.00247249	0.062582	0.0368654	0	0	0.03696
Desulfatiglans	0	0.00843135	0.0016559	0	0.0623543	0.0391222	0.0320749	0.00523972	0.00507911	0	0	0	0	0	0
Mycoplasma	0	0	0.0016559	0	0	0.00177828	0.062263	0	0	0	0	0	0	0.00300616	0
Thiomicrospira	0	0	0	0	0	0	0	0.00349314	0	0	0	0	0	0.0616263	0.00462
Candidatus Babela	0.0615429	0.012647	0.0182149	0.0142045	0.00813317	0.0195611	0.00188676	0.00349314	0.00507911	0.0247249	0.0298009	0	0.0086024	0	0
Caldicoprobacter	0	0	0.00331181	0.0177557	0.0352437	0.0604616	0	0	0.00253955	0	0	0.00263324	0	0	0
Saprospira	0.00724034	0	0	0	0.0135553	0.0106697	0	0	0	0	0.0596019	0.0131662	0	0.00450924	0.00462
Symbiobacterium	0	0	0.0016559	0	0.0135553	0.00889142	0	0.0593835	0	0	0	0	0	0.00150308	0
Terrabacter	0.0325815	0.0590194	0	0	0.0108442	0.0195611	0	0.00174657	0.00761866	0.00494499	0.0208607	0.00526648	0.00573493	0.00300616	0.00462
Marivirga	0.0181009	0.0590194	0	0	0	0	0	0	0	0	0	0.00263324	0	0	0.00462
Haloleptolyngbya	0	0	0	0	0.00542211	0.00177828	0.0150941	0	0	0	0	0	0	0.0586202	0
Labrys	0.0289614	0.025294	0.0016559	0	0.00271106	0.00177828	0.0584895	0.00174657	0.00253955	0.00247249	0.0506616	0.0184327	0.00286747	0.00300616	0
Marinobacter	0.00362017	0	0.00496771	0	0.00542211	0.00533485	0.00754703	0	0.0584097	0	0	0.0184327	0.0086024	0	0.00462
Klebsiella	0	0	0	0	0	0	0.00188676	0	0.0584097	0	0	0	0	0	0
Inquilinus	0.0579227	0.0210784	0	0	0	0	0	0	0.00761866	0.00247249	0	0.00263324	0	0	0.00462
Youngiibacter	0	0	0	0.00355114	0.0569322	0.0462354	0	0.0174657	0.00507911	0	0	0	0.0143373	0.00150308	0
Candidatus Micrarchaeum	0	0	0.00331181	0.0568182	0.00271106	0	0.0264146	0	0	0	0	0	0	0	0
Methylosoma	0.00362017	0.00421567	0	0	0.00271106	0.00533485	0	0	0	0	0.0566218	0	0	0.00601233	0.04158
Blastocatella	0	0	0.0016559	0	0.00542211	0	0	0	0.00761866	0	0.0566218	0.0184327	0.00286747	0.00150308	0
Coxiella	0.00362017	0.00843135	0.0115913	0.00710227	0.00271106	0.00177828	0.0566027	0	0	0	0.00298009	0	0	0	0
Vitellibacter	0	0	0	0	0	0	0.0566027	0	0	0	0	0	0.00286747	0	0
Desulforegula	0.00362017	0.0379411	0.0016559	0	0.00542211	0.00711313	0.0150941	0.00349314	0.0558702	0.00247249	0.0238407	0	0	0.00601233	0.01386
Rubripirellula	0	0	0.0016559	0	0	0	0	0	0.0558702	0	0	0	0	0	0
Desulforhopalus	0.0181009	0.00843135	0	0	0.00271106	0.00533485	0.0452822	0	0.00507911	0	0.00298009	0	0	0.00450924	0.0554401
Virgisporangium	0.0362017	0.0548038	0	0	0	0.00177828	0	0	0	0	0	0	0	0	0
Marmoricola	0.0325815	0.0548038	0	0	0.00271106	0.00533485	0	0	0	0	0.0149005	0.00526648	0	0.00450924	0
Phaeobacter	0	0	0	0	0	0.00177828	0.0547159	0.00174657	0	0.00247249	0	0.00263324	0	0	0.00462
Cetobacterium	0	0	0	0	0	0	0	0	0.0126978	0	0.00298009	0	0.0544818	0	0
Sedimentibacter	0.00362017	0	0	0	0	0	0	0	0.00253955	0.0543949	0	0	0	0	0
Chlamydia	0.0543026	0.0505881	0.0281504	0.0284091	0.00271106	0	0.0150941	0	0	0.0197799	0.0119204	0	0.00573493	0.00300616	0.02772
Azorhizobium	0.0543026	0.0295097	0.0132472	0.0461648	0	0.00177828	0.00943378	0.00174657	0.0101582	0	0.00298009	0.0394986	0	0	0.00924001
Ottowia	0.0108605	0.00421567	0	0	0	0.00177828	0.00188676	0	0.0126978	0	0.0536417	0.010533	0	0	0.00462
Blastomonas	0	0	0.0016559	0.00355114	0.0379548	0.0533485	0.00943378	0	0	0	0	0	0	0	0
Granulicella	0	0.00421567	0.034774	0.053267	0	0	0	0	0	0	0.00298009	0	0.00573493	0	0
Methanocaldococcus	0.00724034	0.0210784	0	0	0	0.00177828	0.0528292	0	0	0.00247249	0.00596019	0	0	0	0
Limnothrix	0	0	0	0	0	0	0	0	0	0	0.00596019	0	0	0.0526078	0
Agrobacterium	0	0	0	0	0.0515101	0.0515702	0.00377351	0.00698629	0.00253955	0.00247249	0.00298009	0	0	0	0
Oenothera	0.00362017	0.0210784	0.051333	0.00710227	0	0.00177828	0.00188676	0	0	0	0	0	0.00286747	0.00450924	0
Oryzihumus	0.0506824	0.025294	0	0	0.00542211	0.00355657	0	0.00174657	0.00253955	0.00247249	0.00298009	0	0.00286747	0	0
Adhaeribacter	0.0506824	0.0295097	0	0	0	0.00177828	0	0	0.00253955	0	0.0268208	0	0	0	0
Sorangium	0	0.00421567	0	0	0	0.00177828	0	0	0	0	0.0506616	0.0236992	0.00286747	0.00150308	0.00924001
Methyloferula	0	0	0.0016559	0	0.0243995	0.0497919	0	0	0	0	0	0	0	0	0
Aureivirga	0	0	0	0	0	0	0	0.00873286	0	0	0	0	0	0.0496017	0
Anaerovorax	0.0108605	0	0	0	0	0.00711313	0	0.0192123	0	0.0494499	0	0	0.00286747	0.00150308	0.00924001
Compsopogon	0	0	0	0	0	0	0.0490557	0	0.00253955	0	0	0	0	0	0
Giesbergeria	0.00362017	0.00843135	0	0	0	0.00177828	0	0.0104794	0.0177769	0.0321424	0.00596019	0.0263324	0.0487469	0	0.01848
Acutodesmus	0.00362017	0	0	0	0	0	0	0.0104794	0.0482515	0	0.00298009	0	0	0.00150308	0.00462
Yuhushiella	0	0	0	0	0.0379548	0.0480137	0.00188676	0	0	0	0	0	0	0	0
Rhodobium	0.0289614	0.0421567	0	0	0.00813317	0.0106697	0	0	0.0126978	0	0.0476815	0.0184327	0	0.00450924	0.01848
Wolbachia	0.00362017	0	0	0	0.00542211	0.00177828	0	0.00349314	0.00761866	0	0.0476815	0.0263324	0.0172048	0.00300616	0
Alcanivorax	0	0	0	0	0.00271106	0	0	0	0.00761866	0	0.0476815	0.010533	0.00286747	0	0.00924001
Candidatus Planktophila	0	0	0	0	0	0	0	0.00174657	0.00253955	0	0.0476815	0	0	0	0.00462
Marinilabilia	0	0	0	0	0.00542211	0.00355657	0	0.0471575	0	0	0	0	0	0	0
Kineosporia	0.0470622	0.0463724	0.00496771	0	0.00271106	0.00177828	0	0.00174657	0.00761866	0.00247249	0.00596019	0.00789973	0	0	0
Thioreductor	0	0	0	0	0	0	0	0	0	0	0	0	0	0.0465955	0
Kribbella	0.00724034	0.0463724	0	0	0	0.00355657	0	0	0	0.00247249	0.00596019	0	0	0.00150308	0
Moraxella	0	0	0	0	0.0379548	0.0462354	0.00188676	0	0	0	0.00298009	0	0.00286747	0.00150308	0
Rickettsia	0.00362017	0.00421567	0	0.0142045	0.00271106	0	0.00188676	0.00349314	0.0203164	0	0.0238407	0.0368654	0	0	0.0462
Miniimonas	0	0	0	0	0.0460879	0.0320091	0	0	0	0	0	0	0	0.00150308	0
Brachyspira	0.00362017	0	0	0.00355114	0	0	0.0452822	0	0	0	0	0	0	0	0
Methylovorus	0	0	0	0	0	0	0.0452822	0	0	0	0	0	0	0	0
Asterionella	0	0	0	0	0	0	0	0	0	0	0	0.0447651	0	0	0
Candidatus Anammoximicrobium	0.0398219	0.025294	0.0016559	0.00355114	0.0189774	0.0444571	0.0301881	0.0174657	0.0177769	0.0123625	0	0	0	0	0.00462
Caloramator	0.0144807	0.012647	0	0	0.0108442	0.00889142	0	0.0436643	0	0.00247249	0.00596019	0	0	0.00150308	0
Rhodovulum	0	0	0	0	0	0.00177828	0.00377351	0.00174657	0	0.00247249	0	0	0	0.0435894	0
Cellulophaga	0	0.00421567	0	0	0.00271106	0.00355657	0	0	0	0	0	0	0.0086024	0.0435894	0.00462
Brachybacterium	0.0434421	0.0421567	0	0.00355114	0.00271106	0	0	0	0	0	0.00298009	0	0	0	0
Candidatus Soleaferrea	0	0	0	0	0	0	0.0433954	0	0	0.00494499	0	0	0.00286747	0	0
Bryobacter	0	0	0	0	0	0	0.0433954	0	0	0	0	0	0	0	0
Tistrella	0.00724034	0	0.00496771	0.0142045	0.0243995	0.0177828	0.00566027	0	0.0431724	0.00494499	0.0178806	0.00263324	0	0.00150308	0.00462
Neorickettsia	0	0.00421567	0	0	0	0	0	0	0.0431724	0	0	0	0	0	0
Azovibrio	0.00724034	0.012647	0	0	0.00271106	0	0	0	0.0355537	0.00494499	0.0208607	0	0.043012	0.00150308	0.02772
Caedibacter	0.0144807	0	0.0248385	0.0426136	0	0.00177828	0.0132073	0.00174657	0.00507911	0.00247249	0.0208607	0.00526648	0	0.00300616	0.03234
Candidatus Metachlamydia	0.0108605	0.00421567	0.00496771	0.0426136	0	0	0.0207543	0	0.00761866	0	0.00298009	0	0	0	0.01386
Sporocytophaga	0.0325815	0.0421567	0.0016559	0	0	0	0.00188676	0.00174657	0.0101582	0.00247249	0.0238407	0.010533	0.0258072	0.00150308	0.00924001
Filomicrobium	0.0289614	0.0421567	0	0	0	0	0.00188676	0	0	0	0.00298009	0.00263324	0	0.00150308	0
Alkalilimnicola	0.00362017	0.0421567	0.00662361	0.024858	0.00542211	0.00177828	0	0	0	0	0	0	0	0	0
Demequina	0	0.0421567	0	0	0	0	0	0	0.00507911	0	0.00298009	0.00526648	0.00286747	0.00450924	0
Truepera	0	0	0	0	0.00813317	0.00355657	0	0	0	0	0	0.0421319	0	0	0
Lutispora	0.0362017	0.012647	0	0	0.0379548	0.037344	0	0.00174657	0.0177769	0.0420324	0.0268208	0	0	0.00150308	0.00462
Vibrio	0.00362017	0	0	0	0	0.00177828	0.00188676	0.00174657	0	0.0420324	0	0	0.00573493	0	0
Carnobacterium	0.00362017	0	0.00662361	0.0142045	0	0	0.00188676	0	0.0203164	0.00247249	0.0417213	0.00789973	0	0	0.0231
Roseivirga	0	0	0	0	0	0.00177828	0	0	0.022856	0.00247249	0.0417213	0.0315989	0	0	0.02772
Kocuria	0	0	0	0	0.00542211	0	0	0	0.0152373	0	0.00298009	0	0	0	0.04158
Microbulbifer	0	0	0	0	0.00271106	0	0.0415087	0	0.0406329	0.00247249	0.00596019	0.00263324	0	0.00150308	0.00924001
Catellatospora	0.0108605	0.0295097	0	0	0.0379548	0.0409005	0	0.00174657	0.00507911	0.00247249	0	0	0	0	0
Labrenzia	0	0	0	0.00355114	0.0379548	0.0409005	0	0	0	0	0.00298009	0	0	0	0
Geodermatophilus	0.00362017	0	0	0	0	0	0	0.00174657	0.0406329	0	0.00298009	0	0	0	0.00462
Tepidibacter	0	0	0	0	0.00271106	0	0	0.00174657	0	0	0	0	0.0401445	0	0
Candidatus Protochlamydia	0.0398219	0.00421567	0.0215267	0.0142045	0	0	0	0.00174657	0.00761866	0.0123625	0	0.00526648	0	0	0
Saccharophagus	0.0398219	0.0379411	0	0	0	0	0	0	0.00253955	0	0.0119204	0.00526648	0	0.00150308	0
Alishewanella	0.0398219	0.012647	0	0	0	0.00177828	0	0	0.0152373	0	0.00596019	0.00263324	0	0.00150308	0
Methylonatrum	0	0.00421567	0	0.024858	0	0.00533485	0.0396219	0	0	0.00247249	0.00298009	0	0	0.00300616	0.00462
Desulfotalea	0	0.00843135	0	0	0	0.00177828	0.0396219	0	0	0	0	0	0	0	0
Pannonibacter	0	0	0	0	0	0	0.0396219	0	0	0	0	0.0184327	0	0	0
Buttiauxella	0	0	0	0	0	0	0	0.00349314	0.00253955	0.0395599	0	0	0.0286747	0.00150308	0
Roseobacter	0	0	0	0	0.0243995	0.0391222	0.00188676	0	0	0	0	0.00263324	0	0	0
Sphingorhabdus	0	0	0	0	0.0216884	0.0302308	0	0.00873286	0.00507911	0	0	0	0.0200723	0.0390801	0
Candidatus Nitrosotalea	0	0	0.00827952	0.0390625	0	0	0	0	0	0	0	0	0	0	0
Serratia	0	0	0	0	0.00271106	0	0	0.00174657	0	0.0173075	0.0387412	0	0.0286747	0	0.00462
Candidatus Magnetobacterium	0.00362017	0.00843135	0.0380858	0.00355114	0	0	0	0	0	0	0	0	0	0	0
Roseimicrobium	0	0	0.0380858	0.0106534	0	0	0	0	0	0	0	0	0	0	0
Rickettsiella	0.0144807	0.0379411	0.0115913	0	0.0108442	0.0337874	0	0	0	0.00494499	0	0	0.0114699	0	0.00462
Desulforhabdus	0	0.0379411	0	0	0.0243995	0.0320091	0.00188676	0	0	0.00494499	0.00298009	0	0	0.00150308	0
Slackia	0.0181009	0.00421567	0	0	0	0	0.0377351	0	0.00253955	0.0247249	0	0	0	0	0
Metallibacterium	0	0	0	0	0	0	0.0377351	0	0	0	0.0357611	0	0	0	0.00462
Marichromatium	0	0	0	0	0	0	0	0.00174657	0.00507911	0	0	0	0	0.037577	0
Diplosphaera	0	0	0	0	0	0	0	0	0	0.0370874	0	0	0	0	0
Desulfuromusa	0.0362017	0.012647	0	0.00355114	0.00542211	0.00355657	0.0358484	0.024452	0.0101582	0	0.00596019	0	0	0.0135277	0.03696
Lactobacillus	0	0	0.0198708	0.00355114	0	0	0	0	0	0	0.00298009	0.00526648	0.0086024	0	0.03696
Zoogloea	0.0362017	0.0210784	0	0.00355114	0	0.00533485	0.00566027	0	0.0152373	0.014835	0.0149005	0.00526648	0.0114699	0.00150308	0.00462
Pasteuria	0.0362017	0.0168627	0	0	0	0	0	0	0.0101582	0.00247249	0.0208607	0.00789973	0	0	0
Telluria	0.0362017	0	0.00331181	0	0	0	0	0.00174657	0	0.00247249	0.0119204	0	0.00286747	0.00150308	0
Alteromonas	0.0362017	0.025294	0	0	0	0	0	0.00174657	0.00507911	0	0.00298009	0	0	0.00150308	0.00462
Thermodesulfatator	0.0362017	0.0295097	0	0	0	0	0	0	0.00253955	0	0	0	0	0.00150308	0
Rhodospirillum	0	0	0	0	0	0	0.0358484	0	0	0.00247249	0	0	0	0	0
Turicibacter	0	0	0	0	0.0108442	0.0177828	0.0358484	0.024452	0.0101582	0	0	0	0	0.00450924	0.00462
Dinoroseobacter	0.00362017	0	0	0	0	0	0	0	0	0	0.0357611	0.00263324	0	0.00150308	0
Roseococcus	0	0	0	0	0	0.00177828	0	0.00174657	0.00761866	0.014835	0.0357611	0.00526648	0	0	0
Oleiphilus	0	0	0	0	0	0	0	0	0.0355537	0.00247249	0.00298009	0.00526648	0.00286747	0	0
Perlucidibaca	0	0	0	0	0	0	0	0	0.0355537	0	0	0.0263324	0.0143373	0	0.01848
Tsukamurella	0	0	0.0016559	0	0.0352437	0.0284525	0.00188676	0	0	0	0	0	0	0.00150308	0
Oceanococcus	0	0	0	0	0	0	0.00188676	0	0	0	0	0	0	0.0345709	0
Methanimicrococcus	0	0	0	0	0	0	0.0339616	0	0	0	0	0	0	0	0
Methylomarinum	0	0	0	0.00355114	0.0271106	0.0337874	0	0	0	0	0	0	0	0	0
Microlunatus	0.021721	0.0337254	0	0	0	0.00711313	0	0	0	0.0222524	0	0	0.00286747	0.00150308	0
Bartonella	0.0108605	0.0337254	0	0	0	0	0.00188676	0	0	0.00247249	0	0.00263324	0	0	0
Geobacillus	0	0	0	0	0	0	0	0.0331849	0.00253955	0	0	0	0	0.00150308	0
Fimbriimonas	0	0	0.0331181	0.0213068	0	0	0	0	0	0	0.00298009	0	0	0	0
Kouleothrix	0.0144807	0.0168627	0	0	0.00813317	0.00711313	0	0	0.0152373	0	0.032781	0.0131662	0	0	0
Filimonas	0	0	0	0	0	0	0	0.00174657	0	0.00247249	0.032781	0	0	0	0.00462
Lysinibacillus	0.0325815	0.0210784	0	0.00355114	0.00542211	0.0177828	0	0.0104794	0	0.00988997	0.0178806	0.00263324	0.0086024	0.00300616	0
Corallococcus	0.0325815	0.00843135	0.0182149	0	0	0	0	0	0	0	0	0	0	0	0
Nitriliruptor	0.0325815	0	0	0	0.00542211	0.00177828	0.00566027	0	0	0	0	0	0	0	0
Granulosicoccus	0.0325815	0	0	0	0	0	0	0	0	0	0	0	0.00286747	0	0
Polynucleobacter	0.00362017	0	0	0	0	0	0	0.00174657	0	0	0	0	0.0258072	0	0.03234
Neosiphonia	0	0.00421567	0	0	0.00813317	0.00533485	0.0320749	0.024452	0	0	0	0	0	0.00150308	0
Segetibacter	0	0.00421567	0.00827952	0.0319602	0.00271106	0	0.00188676	0.00174657	0.00253955	0	0.0268208	0.0236992	0	0	0.00462
Polaribacter	0	0	0	0.0319602	0	0	0	0.00174657	0.0253955	0	0.00298009	0	0	0.00450924	0
Melghirimyces	0	0	0.0248385	0.0319602	0.00271106	0.00177828	0	0	0	0	0	0	0	0.00150308	0
Saccharospirillum	0	0.00421567	0.0016559	0.00355114	0.00271106	0.00177828	0	0	0.0126978	0	0.0119204	0.0315989	0.00286747	0	0
Thalassiosira	0	0	0	0	0	0.00177828	0	0	0	0	0	0.0315989	0	0.00901849	0
Bonnemaisonia	0	0	0	0	0	0	0	0	0	0	0	0.00263324	0	0.0315647	0
Thioalkalibacter	0	0	0	0	0.00542211	0.0106697	0	0.0314383	0	0	0	0	0	0.00751541	0.00462
Oceanicoccus	0.00362017	0	0	0	0	0	0	0	0.0304746	0	0.00596019	0.00263324	0.00286747	0	0.01848
Chitinilyticum	0	0	0	0	0	0	0.00377351	0	0.0304746	0	0	0	0.00286747	0	0.00462
Shigella	0	0.00843135	0	0	0	0	0	0	0.0304746	0	0	0	0	0	0
Methanocella	0	0.00843135	0	0	0.0135553	0.0302308	0	0	0	0	0	0	0	0	0
Victivallis	0	0.00421567	0	0	0	0	0.0301881	0	0	0	0	0	0.00286747	0	0
Zygnema	0	0	0.0298063	0	0	0.00177828	0	0	0	0	0	0	0	0	0
Turneriella	0.021721	0.00843135	0	0	0.00813317	0.00533485	0.0132073	0	0.0101582	0	0.0298009	0.00263324	0	0	0.01848
Geitlerinema	0.00362017	0	0	0	0	0	0	0	0	0	0.0298009	0.00263324	0	0	0.00462
Roseovarius	0	0	0	0	0	0	0	0	0.00253955	0.00494499	0.0298009	0.00263324	0	0	0
Aridibacter	0	0.00421567	0	0	0	0.00355657	0	0	0.0126978	0.00247249	0.0298009	0	0	0	0.00462
Corynebacterium	0	0	0	0	0	0	0.00754703	0	0	0	0.0298009	0	0	0	0
Iodobacter	0	0	0	0	0	0	0	0	0	0	0.0298009	0	0.0114699	0	0
Aquisphaera	0	0	0	0	0.00542211	0	0	0	0	0.0296699	0	0	0	0	0
Archangium	0.0181009	0.0295097	0	0	0	0.00177828	0	0.00349314	0.0203164	0.00494499	0.00596019	0	0	0.00300616	0
Cenarchaeum	0.00362017	0.0295097	0	0	0	0	0	0	0	0	0	0	0.00286747	0	0
Candidatus Phytoplasma	0.00724034	0.00843135	0	0	0	0	0	0	0	0	0.00298009	0.0289657	0.00286747	0.00150308	0
Alicyclobacillus	0.0289614	0	0	0	0	0	0	0	0	0.00247249	0.00894028	0	0	0	0
Bythopirellula	0.0289614	0.025294	0	0.00355114	0.0189774	0.0106697	0.0188676	0	0.0101582	0.00247249	0	0.010533	0	0.00150308	0
Nitrospina	0.0289614	0	0	0	0.00271106	0.00355657	0.00188676	0	0.00253955	0	0	0	0	0	0
Pelagicoccus	0.0289614	0	0	0	0	0	0	0	0	0	0	0	0	0.00150308	0
Nemalionopsis	0	0	0	0	0.00542211	0.00355657	0	0	0	0.00247249	0	0.0236992	0	0.0285585	0
Planomicrobium	0	0	0.0016559	0	0.0216884	0.0284525	0	0.0192123	0.0101582	0	0.00298009	0	0	0.00150308	0
Candidatus Rhabdochlamydia	0	0.00421567	0.0132472	0.0284091	0	0	0	0	0.00253955	0.0222524	0	0	0	0	0
Nitrosococcus	0	0	0.00662361	0.0284091	0.00271106	0.00177828	0.0132073	0	0.00253955	0.0197799	0.0119204	0.00263324	0	0.00150308	0
Leuconeurospora	0	0	0.0182149	0.0284091	0	0	0	0	0	0	0	0	0	0.00150308	0
Elioraea	0.0181009	0	0	0.024858	0.00271106	0.00177828	0.0283014	0	0.00253955	0	0	0	0	0.00150308	0
Solimonas	0	0.00421567	0	0	0.0162663	0.0195611	0.0283014	0.00174657	0	0.00988997	0	0	0.00286747	0	0
Algisphaera	0	0	0	0	0	0	0.0283014	0	0.0126978	0	0.0178806	0.00263324	0	0	0
Brevinema	0	0	0	0	0.0108442	0.00355657	0.0283014	0	0	0	0	0	0	0	0
Erythromicrobium	0	0	0	0	0.00271106	0.00177828	0.0283014	0	0	0	0	0	0	0	0
Ectothiorhodospira	0	0	0.0281504	0.0142045	0	0	0	0	0	0	0	0	0	0	0
Thiohalocapsa	0	0	0	0	0.00542211	0.00889142	0	0.00349314	0.0279351	0	0	0	0	0	0
Teredinibacter	0	0	0	0	0	0	0	0	0.0279351	0	0	0	0	0	0
Cycloclasticus	0	0	0	0	0	0	0	0	0	0	0	0	0	0	0.02772
Dehalobacterium	0	0	0	0	0	0	0	0	0	0	0	0.00263324	0	0	0.02772
Propionispora	0	0	0	0	0.00271106	0.00177828	0.00188676	0	0	0.0271974	0	0	0.00573493	0	0
Thermomicrobium	0	0	0	0	0.0271106	0.0177828	0	0	0	0	0	0	0	0	0
Aureoumbra	0	0.00843135	0	0	0	0	0	0	0	0	0	0	0	0.0270555	0
Asticcacaulis	0	0.012647	0.0115913	0	0	0.00177828	0	0	0	0.014835	0.0268208	0.010533	0	0.00150308	0
Hylemonella	0	0	0.0016559	0	0	0	0	0.00174657	0	0.00247249	0.0268208	0.00789973	0	0.00150308	0.00462
Solibacillus	0.00362017	0.0168627	0	0	0.00271106	0.0266743	0	0.00174657	0.00761866	0	0.00298009	0	0.00286747	0	0
Methanolinea	0	0.00421567	0	0	0.0135553	0.0266743	0.00566027	0	0	0	0	0	0	0	0
Kaistia	0.0108605	0.025294	0	0	0	0	0.0264146	0.00349314	0.00253955	0.00494499	0.0208607	0.00526648	0	0.00150308	0.00924001
Nodosilinea	0	0	0	0	0	0	0.0264146	0	0	0	0	0	0	0.00901849	0
Pandoraea	0	0	0	0.00355114	0	0	0.0264146	0	0	0	0	0	0	0	0
Rudaea	0.0108605	0.00421567	0.0231826	0	0	0	0.00188676	0.00174657	0.00253955	0	0.00298009	0.0263324	0	0	0
Cyanoptyche	0	0.0210784	0	0.00355114	0.00271106	0.00533485	0	0.00349314	0	0.00247249	0	0.0263324	0	0	0
Thermoactinomyces	0	0	0	0	0.00271106	0.00533485	0.0169808	0.0261986	0.00253955	0	0	0	0	0.00150308	0.00462
Bordetella	0.00362017	0	0.0016559	0	0	0	0	0	0	0	0	0	0.0258072	0	0
Oscillatoria	0	0	0	0	0	0	0	0	0	0	0	0	0.00286747	0.0255524	0
Clostridiisalibacter	0.00724034	0	0	0	0	0	0.00754703	0	0.0253955	0	0.0149005	0.00526648	0	0	0
Desulfovirga	0.021721	0.025294	0	0	0	0	0	0	0.00253955	0	0.00894028	0	0	0.00150308	0
Afifella	0.0144807	0.025294	0	0	0.00271106	0.0106697	0	0	0	0	0	0.00263324	0	0.00150308	0
Tistlia	0	0.025294	0	0	0	0	0.00188676	0	0	0	0	0	0	0.00150308	0
Propolis	0	0	0	0.024858	0	0	0	0	0	0	0	0	0	0	0
Altererythrobacter	0.00362017	0	0	0	0.00813317	0.00355657	0.0245278	0	0.00253955	0	0.00894028	0.00263324	0.0086024	0	0.00462
Vampirovibrio	0	0	0	0	0.0216884	0.0177828	0.0245278	0.00174657	0	0	0	0	0	0.00300616	0
Methanothermobacter	0	0	0	0	0.00271106	0	0.0245278	0	0	0	0	0	0	0	0
Thioprofundum	0	0	0	0	0.00271106	0	0.0245278	0	0	0	0	0	0	0	0
Haloterrigena	0	0	0	0	0	0	0.0245278	0	0	0	0	0	0	0	0
Cyanophora	0	0	0	0	0.0243995	0.0142263	0	0	0	0	0	0	0	0	0
Methylothermus	0	0	0	0	0.0243995	0.0177828	0	0	0.0126978	0	0	0	0	0	0
Plocamium	0	0.00421567	0	0	0.0243995	0.0231177	0.00188676	0	0	0	0	0	0	0	0
Desulfosalsimonas	0	0	0	0	0	0	0	0.0209589	0.00253955	0	0	0	0	0.0240493	0
Candidatus Thiobios	0.0108605	0.0210784	0	0	0.00813317	0.00177828	0	0.00174657	0.00761866	0	0.0238407	0.0184327	0.00286747	0	0
Cribrihabitans	0	0	0	0	0	0	0	0	0.00253955	0.00247249	0.00596019	0.0236992	0	0	0
Stigeoclonium	0	0	0	0	0	0	0.00188676	0	0	0	0	0.0236992	0	0	0
Pantoea	0	0	0	0	0	0.00177828	0.0169808	0.00349314	0.0126978	0	0.0149005	0.010533	0.0143373	0.00150308	0.0231
Heterosigma	0	0	0	0	0	0	0	0	0	0	0	0.00526648	0	0	0.0231
Aquitalea	0	0	0	0	0	0	0.00754703	0	0.00253955	0.0197799	0	0	0.0229397	0	0
Thiofractor	0	0	0	0	0.0135553	0.012448	0.0188676	0.0227054	0	0.014835	0	0	0	0	0
Desulfatiferula	0	0	0.0016559	0	0.00271106	0	0.00943378	0.0227054	0	0	0	0	0	0	0
Gelria	0	0	0	0.0177557	0	0.00177828	0.0207543	0.0227054	0	0	0	0	0	0	0
Soehngenia	0	0	0	0	0	0	0.0113205	0.0227054	0	0	0	0	0	0.00751541	0.01386
Desulfopila	0.00362017	0	0	0	0	0	0.0226411	0	0.00507911	0.00247249	0	0	0	0	0.01386
Merismopedia	0	0	0	0	0.00542211	0.00533485	0.0226411	0	0	0.00247249	0.00298009	0	0	0	0.00462
Aerosakkonema	0	0	0	0	0	0	0.0226411	0	0	0	0	0	0	0.00150308	0
Candidatus Brocadia	0	0.00843135	0	0	0	0	0.0226411	0	0.0126978	0	0	0	0	0	0
Marisediminicola	0.0144807	0.012647	0.0016559	0	0.00271106	0.00533485	0	0	0.00507911	0.0222524	0.0149005	0.0157995	0.00573493	0.00150308	0.00924001
Cesiribacter	0.021721	0	0	0	0	0	0	0	0	0.00247249	0	0	0	0	0
Marispirillum	0.021721	0.00843135	0	0	0	0	0.00566027	0	0	0	0.00298009	0	0	0	0
Dictyoglomus	0	0	0	0	0.0216884	0.00889142	0	0	0	0	0.00298009	0	0	0.00150308	0
Rubellimicrobium	0	0	0	0	0.0162663	0.0213394	0	0	0.00761866	0	0.00298009	0	0	0	0.00462
Cryocola	0	0	0	0	0.0108442	0.0213394	0	0	0	0	0	0	0	0	0.00462
Acidiphilium	0	0	0.0016559	0.0213068	0	0	0	0	0	0	0	0	0	0	0
Chelativorans	0.0108605	0.0210784	0	0	0	0	0	0	0	0	0.00298009	0	0	0	0
Albidovulum	0	0.0210784	0	0	0	0	0	0	0	0	0	0	0	0	0
Thioalbus	0	0.0210784	0	0	0	0	0	0.00174657	0.00253955	0	0	0	0	0.00150308	0.00462
Cyanidium	0	0	0	0	0.00271106	0.00177828	0.0169808	0	0.00253955	0	0.0208607	0	0	0.00150308	0.00924001
Methanomethylovorans	0	0	0	0	0	0	0.0207543	0	0	0	0	0	0	0	0
Loktanella	0	0	0.0016559	0	0	0	0	0	0.0203164	0	0	0	0.00573493	0.00601233	0
Phaeoclavulina	0	0	0	0	0	0	0	0	0.00253955	0	0	0	0.0200723	0	0
Parachlamydia	0.00724034	0	0.0198708	0.0142045	0	0	0.00754703	0	0.0101582	0	0	0	0.00286747	0	0
Enhydrobacter	0	0	0	0	0	0	0	0	0.00253955	0.0197799	0.00298009	0	0.0143373	0	0
Laribacter	0	0	0	0	0	0	0	0	0	0.0197799	0	0	0	0	0
Salinisphaera	0	0	0	0	0	0	0.00188676	0.0104794	0	0	0	0	0	0.0195401	0
Pricia	0	0	0	0	0	0	0.00188676	0.0192123	0	0	0	0	0	0.0120247	0
Streptacidiphilus	0	0	0	0	0.0189774	0.00889142	0	0	0	0	0	0	0	0	0
Syntrophothermus	0	0	0	0	0.0189774	0.0177828	0	0.0139726	0	0	0	0	0	0	0
Catabacter	0	0	0	0	0	0.00177828	0.0188676	0	0	0	0	0	0	0	0
Rhodanobacter	0	0	0	0	0	0	0.0188676	0	0	0	0	0	0	0	0
Methylovulum	0	0	0	0	0	0	0	0	0	0	0	0	0	0.00300616	0.01848
Halomonas	0.00724034	0	0	0	0	0.012448	0	0.00349314	0.0177769	0	0.00596019	0.0184327	0	0	0
Chamaesiphon	0	0	0.0016559	0	0	0	0	0.00174657	0.0126978	0	0.00298009	0.0184327	0.00286747	0.00150308	0
Leeuwenhoekiella	0	0	0	0	0	0	0	0	0	0	0	0.0184327	0	0	0
Simkania	0.0181009	0	0.00331181	0.0106534	0.00271106	0	0.00188676	0	0.00253955	0	0	0	0	0	0
Carboxydothermus	0.0181009	0	0.0016559	0	0	0	0.00377351	0	0	0	0	0	0	0	0
Limimonas	0.0181009	0.00843135	0	0	0	0	0	0	0	0	0	0	0	0	0
Caenimonas	0	0	0	0	0	0	0	0.00174657	0.00253955	0	0.0178806	0.00789973	0.0114699	0	0
Paracraurococcus	0.00362017	0	0	0	0	0	0	0	0.0177769	0.00247249	0.00596019	0.00263324	0	0.00150308	0.00924001
Novispirillum	0.00362017	0.00843135	0.0016559	0.0177557	0	0.00177828	0.0132073	0	0	0	0	0	0	0	0
Collimonas	0	0	0	0.0177557	0	0	0	0	0	0	0	0	0	0	0
Desertibacter	0	0	0	0.0177557	0	0	0	0	0	0	0	0	0	0	0
Spiroplasma	0	0	0	0	0	0	0	0.0174657	0	0	0	0	0	0	0.00924001
Epulopiscium	0.00362017	0	0	0	0.00271106	0.00355657	0.0150941	0	0	0.0173075	0	0	0	0.00150308	0
Hafnia	0	0	0	0	0	0	0	0	0	0.0173075	0.00298009	0	0.0086024	0	0
Lactococcus	0	0	0	0	0	0	0	0	0	0.0173075	0	0	0	0	0
Plesiomonas	0	0	0	0	0	0	0	0	0.0101582	0.0173075	0	0	0.00286747	0	0
Formivibrio	0	0	0	0	0	0	0	0	0	0.00494499	0	0	0.0172048	0.00300616	0
Planktothricoides	0.0108605	0.00421567	0	0	0	0	0.0169808	0	0	0	0	0	0	0	0
Sphingosinicella	0.00362017	0	0	0	0.00813317	0.00177828	0.0169808	0	0.00253955	0	0.00894028	0	0.00286747	0	0
Algidimarina	0	0.012647	0	0	0.00813317	0	0.0169808	0.00174657	0.00761866	0.00741748	0.00596019	0.00263324	0	0.00150308	0
Natronomonas	0	0.00421567	0	0	0.00542211	0.00177828	0.0169808	0	0	0	0	0	0	0	0
Acaryochloris	0	0	0	0	0	0	0.0169808	0	0	0	0	0	0	0	0
Arenibacter	0	0	0	0	0	0	0.0169808	0	0	0	0	0.00263324	0.0086024	0	0
Candidatus Lariskella	0	0	0	0	0	0	0.0169808	0	0	0	0	0	0	0	0
Desulfonema	0	0	0	0	0	0	0.0169808	0.00174657	0	0	0	0	0	0	0
Rhodovibrio	0.0108605	0.0168627	0.0016559	0	0	0	0.00566027	0	0	0.00247249	0	0.0131662	0	0	0
Marinoscillum	0.00362017	0.0168627	0	0	0	0	0	0	0.00507911	0	0	0.010533	0	0	0.00462
Tumebacillus	0	0.0168627	0.00827952	0.0142045	0	0	0	0	0	0.00247249	0	0	0	0.00150308	0
Capnocytophaga	0	0.0168627	0	0	0.00271106	0	0	0	0	0	0.00596019	0.00263324	0	0	0
Euglena	0.0108605	0	0.016559	0	0	0.00177828	0	0	0	0	0	0	0	0.00150308	0
Microcoleus	0	0	0	0	0	0	0	0	0	0	0	0	0.00286747	0.0165339	0
Sinorhizobium	0	0	0	0	0.00542211	0.0160046	0.00754703	0	0.0152373	0.00247249	0.00596019	0	0.00286747	0	0
Pseudanabaena	0.00362017	0.00843135	0	0	0	0	0	0	0	0	0.00298009	0.0157995	0.00573493	0	0
Kluyvera	0	0	0	0	0	0	0	0	0	0	0	0.0157995	0	0	0
Mitsuaria	0	0	0	0	0	0	0	0	0.00253955	0	0	0.0157995	0.00286747	0	0
Brevibacillus	0	0.00421567	0	0	0	0	0	0.0157192	0.00507911	0	0.00298009	0	0	0	0
Aneurinibacillus	0	0.00421567	0	0	0	0	0	0.0157192	0	0	0	0	0.00286747	0	0
Candidatus Captivus	0.00362017	0.00421567	0	0.00355114	0.00542211	0.012448	0.00188676	0	0.0152373	0.00247249	0.00596019	0.0131662	0	0	0
Delftia	0	0.00421567	0	0	0	0	0	0.012226	0.0152373	0	0.00298009	0	0.00286747	0	0
Myxococcus	0	0	0	0	0	0	0.0150941	0	0	0	0.00894028	0	0	0	0.00462
Candidatus Trichorickettsia	0	0	0.0016559	0	0	0	0.0150941	0.00523972	0	0	0	0	0	0.00150308	0
Candidatus Aquirestis	0	0	0	0	0	0	0.0150941	0	0	0	0	0	0	0	0
Carboxydocella	0	0	0	0	0	0	0.0150941	0	0	0	0	0	0	0.00150308	0
Shinella	0	0.00421567	0	0	0	0	0.0150941	0	0	0	0	0.00263324	0	0	0
Cymatopleura	0	0	0.00993542	0	0	0	0	0.00349314	0	0	0.00298009	0.00789973	0.00286747	0.0150308	0
Trichomonas	0	0	0	0	0	0	0	0	0	0	0	0	0	0.0150308	0
Coccomyxa	0	0	0.0149031	0	0	0	0	0	0	0	0.00298009	0.00263324	0	0	0
Roseinatronobacter	0	0.012647	0	0	0	0	0	0.00174657	0	0.00247249	0.0149005	0.00526648	0	0.00150308	0
Thioclava	0	0	0	0	0	0	0	0	0.00253955	0.00247249	0.0149005	0.00263324	0	0	0
Pseudahrensia	0	0	0	0	0	0	0	0	0	0.014835	0.00298009	0	0	0	0
Sediminihabitans	0	0	0	0	0.00271106	0.00355657	0	0.00174657	0	0.014835	0	0.00263324	0	0	0.00924001
Aquicella	0.0144807	0.00421567	0	0.00710227	0	0	0.00754703	0	0	0.0123625	0	0	0	0	0
Acetobacterium	0.0144807	0.00843135	0	0	0	0.00533485	0.0132073	0	0	0.00988997	0	0.00263324	0	0.00150308	0
Armatimonas	0.0144807	0	0	0	0	0	0	0	0	0	0.00298009	0	0	0	0
Ectothiorhodosinus	0.0144807	0	0	0	0	0	0	0	0	0	0.00298009	0	0	0	0
Flexithrix	0.0144807	0.012647	0	0	0	0.00533485	0	0	0.0101582	0	0.00298009	0.00526648	0	0	0
Sulfitobacter	0.0144807	0	0	0.00355114	0.00813317	0.00355657	0	0.00174657	0	0	0	0	0	0	0
Halovibrio	0.0144807	0	0	0	0	0	0	0	0	0	0	0	0	0	0
Koliella	0.0144807	0.00421567	0	0	0	0	0	0	0	0	0	0	0	0	0
Stenotrophomonas	0	0	0	0	0	0	0.00377351	0	0.00507911	0.00247249	0.00894028	0	0.0143373	0.00901849	0
Azotobacter	0	0	0	0.00355114	0	0	0.00377351	0.00174657	0.0101582	0	0	0.010533	0.0143373	0	0.00924001
Candidatus Carsonella	0	0	0	0	0.00542211	0.0142263	0	0	0	0.00247249	0.00894028	0.00263324	0	0	0
Mangroviflexus	0	0	0	0	0.00813317	0.0142263	0	0	0	0	0.00298009	0	0	0	0
Tepidamorphus	0	0	0	0	0.00542211	0.0142263	0	0	0	0	0	0	0	0	0
Neochlamydia	0.0108605	0	0.00331181	0.0142045	0	0	0.00754703	0	0.00253955	0	0.00298009	0.00263324	0	0	0.00462
Candidatus Pelagibacter	0	0	0.00993542	0.0142045	0	0	0	0	0	0	0	0	0	0	0
Pezicula	0	0	0	0.0142045	0	0	0	0	0	0	0	0	0	0	0
Achromobacter	0	0	0	0	0	0	0	0	0	0	0	0.00263324	0	0	0.01386
Muricauda	0	0	0	0	0	0	0	0	0	0	0	0	0	0.00300616	0.01386
Spirobacillus	0	0	0	0	0	0.00177828	0	0	0	0	0	0	0	0	0.01386
Petriella	0	0	0.0016559	0	0.0135553	0.0106697	0.00188676	0.00174657	0	0.00247249	0	0	0.00286747	0	0
Saccharothrix	0	0	0.0132472	0.0106534	0	0	0.00188676	0	0	0	0	0	0	0	0
Candidatus Midichloria	0	0	0	0	0	0	0.0132073	0	0	0	0	0.00789973	0.0114699	0	0.00462
Deferribacter	0	0	0	0	0	0	0.0132073	0	0	0	0	0	0	0	0
Methyloceanibacter	0	0	0	0	0	0	0.0132073	0	0	0	0	0	0	0	0
Melosira	0	0.00843135	0	0	0	0	0	0	0	0.00247249	0	0.0131662	0	0	0
Agitococcus	0	0	0	0	0	0	0	0	0	0	0	0.0131662	0	0	0
Crocosphaera	0	0	0	0	0	0	0	0	0	0	0	0.0131662	0	0	0
Gramella	0	0	0	0	0	0.00177828	0	0	0	0	0	0.0131662	0	0	0
Hydrocoleum	0	0	0	0	0	0	0	0	0.0126978	0.00247249	0.00298009	0	0.00573493	0	0
Nitrosomonas	0	0.00421567	0	0	0	0	0.00566027	0.00174657	0.0126978	0	0.00596019	0	0	0	0.00462
Cephaloidophora	0	0	0	0	0	0	0.00188676	0	0.0126978	0	0	0	0	0	0
Fonticella	0	0	0	0	0	0	0	0	0.0126978	0	0	0	0	0	0
Pedinomonas	0	0	0	0	0	0	0	0.00698629	0.0126978	0	0	0	0	0.00150308	0
Neotestudina	0.00724034	0.012647	0	0	0	0	0	0	0	0	0	0	0	0	0
Dechloromarinus	0.00362017	0.012647	0	0	0	0	0	0	0.00253955	0	0.00298009	0	0	0	0
Fictibacillus	0	0.012647	0	0	0	0	0	0.00174657	0.00253955	0	0	0	0	0	0
Povalibacter	0	0.012647	0	0	0	0	0	0	0	0	0	0	0	0	0
Pseudendoclonium	0	0.012647	0	0	0	0	0	0	0	0	0	0	0	0	0
Daeguia	0	0	0	0	0.00542211	0.012448	0	0	0.00253955	0	0	0	0	0	0
Candidatus Chloroploca	0	0	0	0	0	0.012448	0	0	0	0	0	0	0	0	0
Macrococcus	0	0	0	0	0	0	0	0	0	0.0123625	0.00894028	0	0	0	0
Litorimonas	0	0	0	0	0	0.00177828	0	0	0	0.0123625	0.00298009	0	0	0	0
Acidaminococcus	0	0	0	0	0	0	0	0	0	0.0123625	0	0	0.00286747	0	0
Candidatus Piscichlamydia	0	0	0	0	0	0.00177828	0	0.012226	0	0	0.00298009	0	0	0	0
Sneathiella	0	0	0.0016559	0	0	0	0.0113205	0.012226	0	0	0	0	0	0.00300616	0
Piscirickettsia	0	0	0	0	0	0.00177828	0	0.00174657	0	0	0	0	0	0.0120247	0
Methylomicrobium	0.0108605	0	0	0	0	0	0	0	0	0	0.0119204	0	0	0	0.00462
Niabella	0.00362017	0	0	0.00355114	0	0	0.0113205	0.00174657	0	0	0.0119204	0.00526648	0	0.00150308	0.00462
Ehrlichia	0	0	0	0	0	0	0	0	0.00253955	0.00247249	0.0119204	0.00526648	0	0	0
Gluconobacter	0	0	0.0115913	0.00710227	0	0	0.00188676	0	0	0	0	0	0	0	0
Dyadobacter	0	0.00421567	0	0	0	0	0	0	0	0.00247249	0	0	0.0114699	0	0
Geosporobacter	0	0	0	0	0	0	0.00188676	0	0.00507911	0.00247249	0	0	0.0114699	0.00150308	0
Candidatus Accumulibacter	0	0	0	0	0	0	0	0	0	0	0	0	0.0114699	0	0
Natronoflexus	0	0	0	0	0	0.00177828	0	0	0.00507911	0	0	0	0.0114699	0.00601233	0.00462
Methanoplanus	0.00362017	0	0	0	0	0	0.0113205	0	0	0	0	0	0	0	0
Aminobacterium	0	0	0	0	0	0.00177828	0.0113205	0.00174657	0	0	0	0	0	0	0
Candidatus Magnetananas	0	0	0	0	0	0	0.0113205	0	0	0	0	0	0	0	0
Coprococcus	0	0	0	0	0	0	0.0113205	0	0	0	0	0	0	0.00150308	0
Halarchaeum	0	0	0	0	0	0	0.0113205	0	0	0	0	0	0	0	0
Dichelobacter	0.0108605	0	0	0	0	0	0	0	0	0	0	0	0	0	0
Haematobacter	0.0108605	0.00843135	0	0	0	0	0	0	0	0	0	0.010533	0	0	0.00462
Methanospirillum	0.0108605	0.00843135	0	0	0	0	0	0	0	0	0	0	0	0.00150308	0
Ketogulonicigenium	0	0	0	0	0.0108442	0.00355657	0	0	0	0	0	0	0	0	0
Phycicoccus	0	0	0	0	0.0108442	0.00889142	0	0.00349314	0.00253955	0	0	0	0	0	0
Propioniferax	0	0	0	0	0.0108442	0.00711313	0	0	0	0	0	0.00263324	0	0	0
Methylopila	0.00724034	0.00421567	0	0	0.00271106	0.0106697	0	0.00174657	0.00253955	0	0.00298009	0.00263324	0	0.00150308	0.00462
Sandaracinobacter	0	0	0	0	0.00542211	0.0106697	0.00188676	0	0	0	0	0	0	0	0
Thermoflavimicrobium	0	0.00843135	0.00662361	0.0106534	0	0	0.00566027	0	0	0	0.00298009	0	0	0	0
Aggregicoccus	0	0	0	0.0106534	0	0	0	0	0	0	0	0	0	0	0
Syntrophomonas	0	0	0	0	0	0	0.00754703	0	0	0	0	0.010533	0	0.00150308	0
Parasphingopyxis	0	0	0	0	0	0	0	0	0	0	0	0.010533	0	0	0
Reichenbachiella	0	0.00421567	0	0	0	0	0	0	0	0	0	0.010533	0	0	0.00462
Flavonifractor	0	0	0	0	0.00271106	0.00711313	0.00943378	0	0	0	0	0	0	0.0105216	0
Candidatus Marithioploca	0	0	0	0	0	0	0.00188676	0	0	0	0	0	0	0.0105216	0
Pseudoalteromonas	0	0	0	0	0	0	0	0.0104794	0	0	0	0	0	0	0
Silanimonas	0	0	0	0	0	0	0	0.0104794	0	0	0	0	0	0	0
Diaphorobacter	0	0	0	0	0	0	0	0	0.0101582	0	0.00298009	0	0.0086024	0	0
Geminicoccus	0	0	0	0	0.00271106	0	0	0	0.0101582	0	0	0	0	0	0
Chryseomicrobium	0	0	0	0	0	0	0	0	0.0101582	0	0	0	0	0	0
Sphingoterrabacterium	0.00724034	0	0.00993542	0	0	0	0	0	0	0	0	0	0	0	0
Elstera	0	0	0	0	0	0	0.00943378	0	0	0.00988997	0.00596019	0	0	0	0.00462
Epilithonimonas	0	0	0	0	0	0	0	0	0	0.00988997	0	0.00263324	0.0086024	0	0
Fucophilus	0.00724034	0	0	0	0	0	0.00943378	0	0	0.00741748	0.00298009	0	0	0	0
Anaerobranca	0	0	0	0	0	0	0.00943378	0	0	0	0	0	0	0	0
Desulfocarbo	0	0	0	0	0	0	0.00943378	0	0	0	0	0	0	0	0
Geovibrio	0	0	0	0	0	0	0.00943378	0	0	0	0	0	0	0	0
Glossomastix	0	0	0	0	0	0	0.00943378	0	0	0	0	0	0	0	0
Candidatus Nucleicultrix	0	0	0	0	0	0	0	0	0	0	0	0.00526648	0	0	0.00924001
Draconibacterium	0	0	0	0	0	0.00177828	0	0	0	0	0	0	0	0.00150308	0.00924001
Nonlabens	0	0	0	0	0	0	0	0	0	0	0	0	0	0.00901849	0
Anaerosinus	0.00362017	0	0	0	0.00271106	0.00355657	0	0	0	0.00247249	0.00894028	0	0.00286747	0	0
Borrelia	0	0	0	0	0	0	0	0	0.00507911	0	0.00894028	0	0	0	0
Catelliglobosispora	0	0	0	0	0	0	0	0	0.00253955	0	0.00894028	0	0	0	0
Cosmarium	0	0	0	0	0	0	0	0.00174657	0.00253955	0	0.00894028	0	0.00286747	0	0
Desulfonatronospira	0	0	0	0	0	0	0	0	0.00253955	0	0.00894028	0	0	0	0
Ferrovum	0	0	0	0	0	0.00177828	0	0	0	0	0.00894028	0	0	0	0
Synedra	0	0	0	0	0	0.00355657	0	0	0	0	0.00894028	0	0	0	0
Wandonia	0	0	0	0	0	0	0.00188676	0.00174657	0.00507911	0	0.00894028	0.00263324	0	0	0
Nitrobacter	0.00362017	0	0.0016559	0	0.00813317	0.00889142	0	0	0	0	0	0	0	0	0
Microtetraspora	0	0	0.0016559	0	0.00271106	0.00889142	0	0	0	0	0	0	0	0	0
Desulfoluna	0	0.00421567	0	0	0.00542211	0.00889142	0	0	0	0	0	0	0	0	0
Candidatus Parabeggiatoa	0	0	0	0	0	0	0	0.00873286	0	0	0	0	0	0	0
Succinispira	0	0	0	0	0	0	0.00566027	0.00873286	0	0	0	0	0	0	0
Vulcanibacillus	0	0	0	0	0	0	0	0.00873286	0	0	0	0	0	0	0
Yersinia	0	0	0	0	0	0	0	0	0.00253955	0	0.00298009	0	0.0086024	0	0
Nubsella	0	0	0	0	0	0.00177828	0	0	0	0	0	0	0.0086024	0	0
Sydowia	0	0	0	0	0	0	0	0	0	0	0	0	0.0086024	0	0
Thermococcus	0.00724034	0.00843135	0	0.00355114	0	0	0	0	0.00253955	0	0.00298009	0.00263324	0	0	0
Methyloligella	0	0.00843135	0	0	0.00813317	0.00533485	0.00377351	0	0	0	0.00298009	0	0	0	0.00462
Neurospora	0	0.00843135	0	0	0	0	0	0	0	0	0	0	0	0.00150308	0
Pleomorphobacterium	0.00362017	0	0	0	0.00813317	0.00711313	0	0	0	0.00247249	0	0	0	0	0
Methanosarcina	0	0.00421567	0	0	0.00813317	0.00355657	0	0	0	0.00247249	0	0	0	0	0
Actinomycetospora	0	0	0	0	0.00813317	0.00355657	0	0	0	0	0	0.00789973	0	0	0
Albirhodobacter	0	0	0	0	0.00813317	0.00533485	0	0	0	0	0	0	0	0	0
Gracilibacter	0	0	0	0	0.00813317	0	0	0	0	0	0	0	0	0	0
Hydrogenispora	0	0	0	0	0.00813317	0.00355657	0	0	0	0	0	0	0	0	0
Jiangella	0	0	0	0	0.00813317	0.00711313	0	0	0	0	0	0	0	0	0
Leuconostoc	0	0	0	0	0.00813317	0.00177828	0	0	0	0	0	0	0	0	0
Serinicoccus	0	0	0	0	0.00813317	0.00355657	0	0	0	0	0	0	0.00286747	0	0
Marinimicrobium	0	0	0	0	0	0	0	0	0	0	0.00596019	0.00789973	0	0	0.00462
Acanthamoeba	0	0	0	0.00355114	0.00271106	0	0	0	0	0	0.00298009	0.00789973	0	0.00601233	0.00462
Rudanella	0	0	0	0	0	0	0	0	0	0	0	0.00789973	0	0	0
Haloferula	0	0	0	0	0	0	0	0	0.00761866	0	0	0	0	0	0
Jeotgalibacillus	0	0	0	0	0	0.00177828	0	0	0.00761866	0	0	0	0	0	0
Rubrimonas	0	0	0	0	0	0	0.00188676	0	0.00761866	0	0	0	0	0	0
Spirillum	0	0	0	0	0	0	0	0.00174657	0.00761866	0	0	0	0	0	0
Oligosphaera	0.00362017	0.00421567	0	0	0.00271106	0	0.00754703	0	0	0	0	0	0	0	0
Alkalitalea	0	0	0	0	0	0	0.00754703	0	0	0	0	0	0	0	0
Christensenella	0	0	0	0.00355114	0	0	0.00754703	0	0	0	0	0	0	0	0
Desulfarculus	0	0	0	0	0	0	0.00754703	0	0	0	0	0	0	0	0
Desulfobacter	0	0	0	0	0	0	0.00754703	0	0	0	0	0	0	0	0
Halomicronema	0	0	0	0	0	0	0.00754703	0	0	0	0	0	0	0	0
Meganema	0	0	0	0	0	0	0.00754703	0	0	0	0	0	0	0	0
Methanococcoides	0	0	0	0	0	0	0.00754703	0	0	0	0	0	0	0	0
Methanolobus	0	0	0	0	0	0	0.00754703	0	0	0	0	0	0	0	0
Streptosporangium	0	0	0	0	0	0	0.00754703	0	0.00253955	0	0	0.00526648	0	0.00150308	0
Peptococcus	0	0	0	0	0	0	0	0	0	0	0	0	0	0.00751541	0
Thioalkalispira	0	0	0	0	0	0	0.00566027	0	0	0	0	0	0	0.00751541	0
Thiodictyon	0	0	0	0	0	0	0	0.00349314	0	0	0	0	0.00286747	0.00751541	0
Fusarium	0	0	0.0016559	0	0	0	0	0	0	0.00741748	0	0	0	0	0
Fonsecaea	0	0	0	0	0	0.00177828	0	0	0	0.00741748	0	0	0	0	0
Phaeotrichum	0	0	0	0	0	0	0	0	0	0.00741748	0	0	0	0	0
Parasporobacterium	0.00724034	0.00421567	0	0	0.00271106	0.00533485	0	0	0.00507911	0.00494499	0	0.00263324	0	0.00150308	0
Oxalobacter	0.00724034	0	0	0.00355114	0	0	0	0	0	0.00247249	0	0	0.00286747	0.00450924	0
Isoptericola	0.00724034	0	0	0	0.00542211	0	0	0.00174657	0	0	0	0	0	0.00150308	0
Candidatus Nasuia	0.00724034	0	0	0	0.00271106	0	0	0	0	0	0	0	0	0	0
Gardnerella	0.00724034	0.00421567	0	0	0	0	0	0	0	0	0	0	0	0	0
Oceanibacterium	0.00724034	0.00421567	0	0	0	0	0	0	0	0	0	0	0	0	0
Persephonella	0.00724034	0.00421567	0	0	0	0	0	0	0	0	0	0	0	0	0
Phaeospirillum	0.00724034	0.00421567	0	0	0	0	0	0	0.00253955	0	0	0.00263324	0	0	0
Vulgatibacter	0.00724034	0.00421567	0	0	0	0	0	0	0	0	0	0	0	0	0
Shimazuella	0	0	0.00496771	0.00710227	0	0	0	0	0	0	0	0	0	0	0
Desulfobotulus	0	0	0.00331181	0.00710227	0	0	0	0	0	0	0	0	0	0	0
Thermanaeromonas	0	0	0.0016559	0.00710227	0	0	0	0	0	0	0	0	0	0	0
Thermovenabulum	0	0	0	0.00710227	0	0	0	0	0	0	0	0	0	0.00150308	0
Terribacillus	0.00362017	0	0	0	0	0	0.00566027	0.00698629	0	0	0	0	0	0	0
Mesoplasma	0	0	0	0	0	0	0	0.00698629	0	0	0	0	0	0	0
Lactuca	0	0	0.00662361	0	0	0	0	0	0	0	0	0.00263324	0	0	0
Synechocystis	0	0.00421567	0	0	0.00542211	0	0	0	0	0.00247249	0	0	0	0.00601233	0
Candidatus Thioglobus	0	0	0	0	0	0	0	0	0	0	0	0	0	0.00601233	0
Candidatus Hodgkinia	0	0	0	0	0	0	0	0.00174657	0.00253955	0	0.00596019	0	0	0	0
Candidatus Nardonella	0	0	0	0	0	0	0	0	0.00253955	0	0.00596019	0	0	0	0
Euglenaria	0	0	0	0	0	0	0	0	0	0	0.00596019	0.00263324	0	0	0
Ornithobacterium	0	0	0	0	0	0	0	0	0	0	0.00596019	0.00263324	0	0	0
Riftia	0	0	0	0	0	0	0	0	0	0	0.00596019	0.00263324	0	0	0
Kriegella	0	0	0	0	0	0	0	0	0	0	0	0	0.00573493	0	0
Oceanobacillus	0	0	0.0016559	0	0	0	0.00566027	0	0	0	0	0	0	0	0
Hydrogenimonas	0	0	0	0	0.00271106	0	0.00566027	0	0	0	0	0	0	0	0
Polymorphospora	0	0	0	0	0.00271106	0.00177828	0.00566027	0	0	0	0	0	0	0.00150308	0
Dethiobacter	0	0	0	0	0	0	0.00566027	0	0	0	0	0	0	0	0
Dethiosulfatibacter	0	0	0	0	0	0	0.00566027	0	0	0	0	0	0	0	0
Kordiimonas	0	0	0	0	0	0	0.00566027	0	0	0	0	0	0	0	0
Luminiphilus	0	0	0	0	0	0	0.00566027	0	0	0	0	0	0	0	0
Nitrincola	0	0	0	0	0	0	0.00566027	0	0	0	0	0	0	0	0
Orientia	0	0	0	0	0	0	0.00566027	0	0	0	0	0	0	0	0
Sporotomaculum	0	0	0	0	0	0	0.00566027	0	0	0	0	0	0	0	0
Thalassobaculum	0	0.00421567	0	0	0	0	0.00566027	0	0	0	0	0	0	0	0
Tindallia	0	0	0	0	0	0	0.00566027	0	0	0	0	0	0	0	0
Akkermansia	0	0	0	0	0.00542211	0	0	0	0	0	0	0	0	0	0
Frigoribacterium	0	0	0	0	0.00542211	0	0.00377351	0	0	0	0	0	0	0	0
Georgenia	0	0	0	0	0.00542211	0.00355657	0	0	0	0	0	0	0	0	0
Salinimonas	0	0	0	0	0.00542211	0.00177828	0	0	0	0	0	0	0	0.00150308	0
Rathayibacter	0.00362017	0	0	0	0.00271106	0.00533485	0	0	0	0	0.00298009	0	0	0	0
Gracilimonas	0	0	0	0	0.00271106	0.00533485	0	0	0	0	0	0	0	0	0
Nonomuraea	0	0	0	0	0.00271106	0.00533485	0	0	0	0	0	0	0	0	0
Sphaerisporangium	0.00362017	0.00421567	0	0	0	0	0	0	0	0	0	0.00526648	0	0	0
Curtobacterium	0	0	0	0	0	0	0	0	0	0.00247249	0	0.00526648	0.00286747	0	0
Octadecabacter	0	0	0	0	0	0	0	0	0	0	0	0.00526648	0	0	0.00462
Candidatus Vidania	0	0.00421567	0	0	0	0	0	0.00523972	0	0.00247249	0	0	0	0.00150308	0
Tissierella	0	0	0	0	0.00271106	0.00355657	0	0.00523972	0	0	0	0	0.00286747	0	0
Alicycliphilus	0	0	0	0	0	0	0	0.00523972	0.00253955	0	0	0.00263324	0	0	0
Defluviimonas	0	0	0	0	0	0	0.00188676	0.00523972	0	0	0	0	0	0	0
Enterobacter	0	0	0	0	0	0	0	0	0.00507911	0	0.00298009	0	0	0	0
Sarcina	0	0	0.0016559	0	0	0	0	0	0.00507911	0	0	0	0	0	0
Candidatus Competibacter	0	0	0	0	0	0	0	0.00174657	0.00507911	0	0	0	0	0	0
Marinobacterium	0	0	0	0	0	0	0	0	0.00507911	0	0	0	0	0	0.00462
Micarea	0	0	0.00496771	0	0	0	0	0	0	0	0	0	0	0	0
Pseudoxanthobacter	0.00362017	0	0	0.00355114	0	0	0.00188676	0.00174657	0	0.00494499	0	0	0	0	0
Jatrophihabitans	0	0	0	0	0	0	0	0	0	0.00494499	0.00298009	0	0	0.00150308	0
Oleomonas	0	0	0	0	0.00271106	0	0	0	0	0.00494499	0	0	0	0.00150308	0
Propionicimonas	0	0	0	0	0	0	0	0.00174657	0.00253955	0.00494499	0	0	0	0.00300616	0
Candidatus Chloracidobacterium	0.00362017	0.00421567	0	0	0	0	0	0	0	0	0	0	0	0	0.00462
Fluviimonas	0	0	0	0	0	0	0	0	0	0.00247249	0.00298009	0.00263324	0	0	0.00462
Tenacibaculum	0	0	0	0	0	0	0	0	0	0	0	0	0	0.00300616	0.00462
Oscillospira	0	0	0	0	0	0	0	0.00174657	0	0	0.00298009	0	0	0.00450924	0
Congregibacter	0.00362017	0.00421567	0	0	0	0	0	0	0.00253955	0	0	0	0	0	0
Williamsia	0	0.00421567	0.0016559	0	0.00271106	0	0	0	0.00253955	0	0	0.00263324	0	0	0
Amphora	0.00362017	0	0	0	0	0	0	0.00349314	0.00253955	0	0	0	0	0	0
Desulfofrigus	0.00362017	0	0	0	0	0.00177828	0	0	0	0	0	0	0	0.00150308	0
Intestinimonas	0	0	0	0	0.00271106	0.00355657	0	0	0	0	0	0	0	0	0
Selenomonas	0	0	0	0	0.00271106	0.00355657	0	0	0	0	0	0	0	0	0
Thermanaerovibrio	0	0	0	0	0.00271106	0.00355657	0	0	0	0	0	0	0	0	0
Zymophilus	0	0	0	0	0	0	0	0.00349314	0	0	0	0	0.00286747	0	0
Ammoniphilus	0	0	0	0	0	0	0	0	0	0.00247249	0.00298009	0	0	0	0
Bacillaria	0	0	0	0	0	0	0	0	0	0	0	0	0.00286747	0.00150308	0
Desulfosporomusa	0	0	0	0	0.00271106	0.00177828	0	0	0	0.00247249	0	0	0	0	0
	Lakenheath (LH3)	Lakenheath (LH4)	Moor House (MH1)	Moor House (MH2)	Movile Cave Microbial Mat	Andreiasu (AND1a)	Andreiasu (AND1b)	Amhesrt, Ellicott Creek (AM1)	Amhesrt, Ellicott Creek (AM2)	Pipe Creek (PC1)	Pipe Creek (PC2)	Eternal Flames Falls (EF1)	Eternal Flames Falls (EF2)	North Evans, Eighteen Mile Creek (NE)	Gas Port (GP1)
