# Supplementary material for: Facultative methanotrophs are abundant at terrestrial natural gas seeps
Source: Microbiome. 2018 Jun 28;6:118. doi: 10.1186/s40168-018-0500-x (PMC6022506; doi:10.1186/s40168-018-0500-x)
Supplement: Supplementary file 3 — Table S4. Methylocella-specific mmoX abundance. (XLSX 1606 kb) [file 40168_2018_500_MOESM3_ESM.xlsx]

## Sheet: Tables S4
Table S4. Operational taxonical units (OTUs) retrieved from different environmental targeting Methylocella-specific mmoX
OTUs	total reads in OTUs*	Lakenheath Fen Nature Reserve soil	Lakenheath Fen Nature Reserve sediments	Moor House Nature Reserve 1	Moor House Nature Reserve 2	Movile Cave microbial mat	Andreiasu Everlasting Fire 1	Andreiasu Everlasting Fire 2	Ellicott Creek 1	Ellicott Creek 2	Pipe Creek main seep	Pipe Creek minor seep	Eternal Flames Falls 1	Eternal Flames Falls 2	Eighteen Mile Creek	Gasport 1
1	263585	96.2069	0.389076	0.579341	1.21293	0.246153	81.5389	82.7026	0.252686	0.227663	41.1831	43.5099	3.30248	0.561184	0.210111	0.0911886
5	53102	0.161354	0.0912188	0.254491	0.141656	0.0540335	0.263809	0.268515	0.0378272	0.0465674	0.312692	0.308618	0.713391	95.6994	0.045488	0.0286593
6	48496	0.0800417	0.11542	0.0703593	0.327579	95.5132	0.150224	0.145706	0.0635497	0.057778	0.169161	0.0829897	0.173998	0.0629711	0.0736473	0.0442916
7	34814	0.0254101	0.0335089	0.0658683	0.23019	0.0360223	0.0641202	0.0562008	0.0332879	0.0646769	0.0358827	0.0700226	0.114839	0.0222251	0.474375	89.0965
4	55096	0.095923	0.094942	0.0613772	0.150509	0.0740459	0.1374	0.170684	81.9368	0.0931348	0.21017	0.132265	0.191398	0.157428	0.17762	0.0416862
2	91690	0.139755	0.171268	0.200599	0.389553	0.148092	0.216177	0.214396	0.177031	77.8296	0.281936	0.238595	0.243597	0.146315	0.22744	0.148507
8	33845	0.0298568	0.0223393	0.0299401	0.141656	0.0700434	0.0439681	0.0499563	0.0408534	0.0491545	0.0358827	0.072616	0.0521993	0.0185209	72.5209	0.0677401
10	31801	0.0590784	58.3093	0.0374251	0.115095	0.050031	0.0897683	0.112402	0.0378272	0.0344944	0.112774	0.0389014	0.153118	0.0388939	0.0281593	0.0364754
9	32751	0.102911	0.0688795	47.8428	0.0885347	0.0260161	0.148392	0.13738	0.0423665	0.0422556	0.205044	0.142639	0.233157	0.153724	0.0368236	0.0390808
13	19395	0.228055	0.0353706	0.0523952	0.0708278	0.0260161	0.243657	0.266434	0.0226963	0.0250084	5.29014	18.4185	36.2994	0.0629711	0.0194949	0.0156323
14	10522	0.0323978	0.0186161	0.0553892	0.0796813	0.0120074	0.0769442	0.0624454	0.00907853	0.0129354	0.112774	0.072616	35.3911	0.100013	0.0173288	0.0104216
11	23139	0.0470086	0.297857	0.0673653	0.106242	0.0220136	0.0494641	0.0478748	0.0559843	19.5005	0.0307566	0.0674291	0.080039	0.0296335	0.0801456	0.0312647
15	10345	0.00762302	0.00372322	0.00748503	90.9783	0.00600372	0.016488	0.0124891	0.00756544	0.00517415	0.0153783	0.0129671	0.0139198	0.00740837	0	0.00260539
18	7929	0.0114345	14.5652	0.0134731	0.0531208	0.0100062	0.0201521	0.0270597	0.00151309	0.00862359	0.0102522	0.0129671	0.0243597	0.00926046	0.00649829	0
22	5194	0.0705129	0.00930804	0.0224551	0.0265604	0.0120074	0.0806082	0.0790975	0.00605235	0.00603651	14.3275	5.47213	0.0661192	0.0111126	0.0108305	0.00521078
16	9298	0.00635251	0.00930804	0.00449102	0.0265604	0.0100062	0.012824	0.0166521	13.925	0.00862359	0.0102522	0.00518686	0.0104399	0.0129646	0.0259932	0.0182377
17	9166	0.0336683	0.0297857	13.3398	0.0354139	0.0160099	0.0531281	0.0499563	0.00756544	0.0189719	0.0615132	0.036308	0.0626392	0.0277814	0.0151627	0.0234485
21	5934	0.00952877	0.0111696	0.00898204	0.0354139	0.0140087	0.0183201	0.0187336	0.0302618	0.0172472	0.0205044	0.0103737	0.0243597	0.0111126	12.5894	0.00260539
19	6534	0.0279511	0.0167545	9.53743	0.0265604	0.00400248	0.0329761	0.0374672	0.00756544	0.00948595	0.0256305	0.0207474	0.0417595	0.0222251	0.00649829	0.00260539
20	6325	0.0171518	0.00930804	9.25599	0.0442674	0	0.0329761	0.0416302	0.00302618	0.00517415	0.0461349	0.036308	0.0313196	0.0111126	0.0151627	0.00260539
25	2771	0.00698777	5.06544	0.00598802	0.0177069	0.00400248	0.010992	0.0124891	0.00151309	0.00258708	0.0153783	0.00518686	0.0104399	0.00185209	0.00433219	0.00260539
30	2061	0.0215985	0.00372322	0.010479	0.00885347	0.00400248	0.188697	0.0520378	0.00151309	0.00517415	3.60878	3.0006	0.0382795	0.00370418	0.0021661	0
32	1854	0.020328	0.00372322	0.00149701	0.0177069	0	0.16488	0.0353857	0.00907853	0.00344944	3.56264	2.55453	0.0243597	0.00740837	0.0021661	0.00260539
36	1611	0.00381151	0.00372322	0	0	0	0.00366401	0.00416302	0	0.00603651	0	0.00518686	0.0139198	0.00926046	3.4246	0
34	1678	0.00381151	3.07351	0.00149701	0	0	0.00366401	0.0104076	0.00302618	0.00172472	0	0.00518686	0.00347996	0.00370418	0.0021661	0.00260539
44	1453	0.00508201	0.00186161	2.12126	0	0	0.00549602	0.00832605	0.00151309	0.00172472	0.0256305	0.00518686	0	0.00926046	0	0
48	1349	0.0241396	0	0.00748503	0.00885347	0.00200124	0.485481	0.0999126	0.00302618	0	1.90691	1.57162	0.0173998	0.00555628	0	0.00260539
60	1140	0.00698777	0.00186161	0.00149701	0.00885347	0.00400248	0.349913	0.085342	0	0.00431179	1.89153	1.32265	0.0104399	0.00555628	0.0021661	0
95	576	0.00635251	0.00186161	0.00149701	0.00885347	0	0.0201521	0.00208151	0.00151309	0.000862359	1.85052	0.466817	0.0139198	0.00370418	0	0
33	1738	0.022869	0.00186161	0.00598802	0.0177069	0	1.01676	1.82132	0	0.000862359	0.99959	0.142639	0.0243597	0.00370418	0.00433219	0
80	710	0.000635251	0	0	0.0177069	0.00200124	0.00366401	0.00208151	0	0	0	0.00259343	0	0.00185209	0.00649829	1.81856
46	1404	0.00190575	0.0111696	0.00149701	0	0.00200124	1.57369	1.08447	0.00151309	0.00258708	0.0051261	0.0155606	0	0.00185209	0	0
103	526	0.000635251	0	0.00449102	0	0.00200124	0.00366401	0	0	0.00862359	0	0.00518686	0	0	1.09604	0
97	571	0	1.05367	0.00149701	0	0	0.00183201	0	0	0	0	0.00259343	0.00695991	0	0	0
OTUs (greater than 1%) count in each environment		1	5	5	2	1	3	3	2	2	8	7	3	1	4	2
Total reads		157418	53717	66800	11295	49969	54585	48042	66090	115961	19508	38559	28736	53993	46166	38382	849221
																			x	x
